# Supplementary material for: Association between education and health outcomes among adults with disabilities: evidence from Shanghai, China
Source: PeerJ. 2019 Feb 19;7:e6382. doi: 10.7717/peerj.6382 (PMC6385680; doi:10.7717/peerj.6382)
Supplement: Data S1 [file peerj-07-6382-s001.xlsx]

## Sheet: Sheet1
Date	Gender	Disabiliti Type	Disability Severity	Residence Permit	Education Level	Marital Status	BMI≥24	Hemorrhoids	Fatty Liver	High Blood Glucose	Age Range	High Blood Lipid
20140317	2	1	1	2	4	2	0	0	1	0	3	0
20140703	2	1	3	2	3	2	0	1	0	0	5	0
20140826	2	1	1	2	4	1	0	0	1	0	2	0
20140923	1	1	2	2	2	2	0	0	1	1	4	2
20140418	2	1	1	2	2	2	0	0	1	0	3	2
20141211	1	1	4	2	2	2	1	0	1	0	4	2
20140126	2	1	1	2	2	2	0	0	0	0	3	2
20140617	2	1	4	2	2	2	0	1	0	0	4	0
20140818	2	1	1	2	4	2	0	0	0	0	2	0
20140826	2	1	1	2	2	2	0	1	1	0	3	2
20141020	2	1	1	2	2	2	0	1	1	0	4	2
20140312	1	1	3	2	3	2	1	1	0	0	5	2
20140116	2	1	1	2	1	1	0	0	1	0	2	2
20140815	2	1	2	2	3	2	0	0	0	0	2	0
20140815	2	1	4	2	2	2	0	0	1	1	5	2
20140304	2	1	2	2	3	2	1	1	0	1	5	2
20140313	2	1	3	2	2	2	1	1	0	1	4	2
20140813	2	1	4	2	3	2	1	0	0	0	3	2
20140619	2	1	2	2	2	2	0	1	0	0	5	2
20140729	2	1	4	2	2	2	1	1	1	1	5	2
20140826	1	1	3	2	2	2	0	1	0	1	5	2
20140115	1	1	1	2	1	2	0	0	1	1	6	0
20140408	2	1	2	2	3	2	0	0	1	0	6	2
20140529	1	1	3	2	4	2	1	0	0	1	6	2
20140107	1	1	1	2	2	2	0	1	1	1	6	2
20141031	1	1	3	2	2	2	1	0	1	0	6	0
20140124	1	1	2	2	2	2	1	0	1	1	6	0
20140108	2	1	1	2	1	2	1	1	0	1	6	2
20140114	2	1	3	2	1	2	1	1	1	0	6	2
20140124	1	1	1	2	3	2	0	0	0	0	6	0
20140519	1	1	4	2	2	2	0	0	0	1	6	0
20140410	1	1	1	2	1	2	1	1	1	0	6	0
20140317	1	1	4	2	1	2	0	0	0	0	6	0
20141210	1	1	2	2	1	2	1	0	0	0	6	2
20140627	1	1	1	2	3	2	0	0	1	0	6	0
20141210	1	1	1	2	1	3	1	0	0	0	6	0
20140709	1	1	3	2	3	2	1	1	1	0	6	0
20140707	2	1	3	2	4	2	1	1	0	1	6	2
20140312	2	1	4	2	2	2	0	1	0	1	6	2
20140519	1	1	4	2	3	2	1	1	0	1	6	0
20140107	1	1	3	2	1	2	0	0	0	0	6	2
20140212	2	1	4	2	2	2	1	1	0	1	6	2
20140214	1	1	4	2	3	2	1	1	1	1	6	0
20140703	2	1	1	2	1	2	0	1	1	0	6	2
20140709	1	1	3	2	2	2	0	1	1	0	6	0
20141103	2	1	3	2	2	2	1	1	1	0	6	2
20140114	1	1	4	2	3	2	1	0	1	1	6	2
20140410	2	1	1	2	1	2	1	0	0	0	6	2
20140114	1	1	4	2	2	2	1	1	0	0	6	2
20141024	1	1	4	2	2	2	0	0	1	1	6	0
20140108	1	1	1	2	3	2	1	1	1	0	6	0
20140728	1	1	1	2	3	2	0	1	1	0	6	0
20140114	2	1	1	2	3	2	0	0	0	1	6	2
20140707	1	1	3	2	2	2	1	0	0	0	6	0
20140109	1	1	4	2	4	2	1	1	1	0	6	2
20140915	1	1	1	2	3	2	0	0	1	0	6	2
20140408	2	1	1	2	1	2	1	1	0	1	6	2
20140711	1	1	1	2	2	2	0	0	0	0	6	2
20140106	1	1	4	2	2	2	1	0	0	1	6	0
20140409	2	1	1	2	2	2	0	1	0	0	6	0
20140116	2	1	3	2	3	2	1	1	1	1	6	0
20140408	1	1	3	2	3	2	1	0	1	0	6	2
20140410	1	1	1	2	1	2	0	1	1	0	6	0
20140519	2	1	3	2	2	2	0	0	1	1	6	0
20140314	1	1	1	2	1	2	1	1	1	0	6	2
20140409	2	1	1	2	3	3	1	0	0	0	5	2
20140409	1	1	2	2	1	2	1	0	0	0	5	0
20140328	1	1	3	2	4	2	0	0	0	0	5	2
20140402	1	1	2	2	1	2	1	0	0	0	5	2
20140116	1	1	4	2	1	2	1	1	0	1	5	2
20140116	1	1	1	2	3	2	1	0	0	0	5	2
20140108	2	1	1	2	1	2	1	1	0	0	5	0
20140417	1	1	3	2	2	2	0	0	0	0	5	2
20140210	1	1	4	2	4	2	1	1	0	0	5	2
20140417	2	1	1	2	1	2	0	1	0	0	5	2
20140124	1	1	4	2	2	2	0	0	0	0	5	2
20140124	1	1	2	2	2	1	0	0	0	0	5	2
20140707	1	1	1	2	3	2	0	0	0	0	5	0
20140110	1	1	4	2	2	2	1	0	1	1	5	0
20140519	1	1	2	2	2	2	0	0	0	1	5	0
20140813	2	1	2	2	3	2	1	0	0	1	5	0
20140728	2	1	1	2	2	2	0	0	1	0	5	2
20141128	2	1	4	2	2	1	0	1	0	1	5	2
20140214	1	1	4	2	3	2	1	0	0	1	5	2
20140519	1	1	2	2	4	2	1	1	0	0	5	0
20140124	1	1	3	2	2	2	0	1	0	0	5	2
20140728	1	1	1	2	2	2	0	0	1	0	5	2
20140117	2	1	1	2	2	2	0	1	1	0	5	2
20140109	1	1	3	2	3	2	1	0	0	1	5	0
20141128	2	1	3	2	3	2	0	1	0	0	5	0
20141024	1	1	4	2	2	2	1	1	1	0	5	2
20140911	2	1	1	2	3	3	0	1	1	1	5	2
20140707	1	1	3	2	2	2	1	0	1	0	5	2
20140124	2	1	1	2	2	2	1	1	0	1	5	2
20140124	2	1	3	2	2	2	1	1	1	0	5	2
20140519	1	1	1	2	2	2	1	0	1	0	5	2
20141210	1	1	1	2	4	2	0	1	0	0	5	0
20141126	1	1	4	2	3	2	0	0	0	0	5	2
20140106	1	1	2	2	2	2	0	0	0	0	5	0
20141128	1	1	4	2	2	2	0	1	1	0	5	0
20140321	1	1	4	2	2	2	1	0	0	0	5	0
20141128	1	1	1	2	2	2	0	0	0	0	5	2
20140806	1	1	4	2	2	1	0	0	0	1	5	0
20140708	1	1	3	2	2	2	0	1	0	1	5	0
20140730	1	1	1	2	4	2	1	0	0	0	5	2
20140707	2	1	1	2	2	2	0	1	0	0	5	0
20140408	2	1	1	2	2	2	0	1	0	0	5	2
20140110	2	1	4	2	2	2	0	1	0	0	5	2
20140519	2	1	4	2	2	2	1	1	1	0	5	2
20140106	1	1	1	2	2	2	0	1	0	0	5	0
20140408	2	1	2	2	2	2	1	1	1	1	5	2
20140711	2	1	4	2	2	2	0	1	0	0	5	0
20140218	2	1	3	2	3	2	1	1	1	1	5	2
20140627	1	1	2	2	2	2	1	0	1	0	5	2
20140519	1	1	2	2	1	2	1	1	0	0	5	0
20141210	1	1	2	2	4	2	0	1	1	0	5	2
20140108	1	1	2	2	1	2	1	0	0	1	5	2
20140519	1	1	4	2	2	2	1	0	0	1	5	2
20140115	1	1	4	2	2	2	1	0	1	0	5	0
20140106	1	1	1	2	3	1	0	0	0	0	5	0
20140108	1	1	1	2	4	2	0	1	0	0	5	0
20140408	2	1	3	2	2	2	0	0	0	0	5	0
20140126	2	1	1	2	1	3	0	1	1	1	5	2
20140703	1	1	2	2	2	2	0	0	1	0	5	2
20140707	1	1	4	2	2	1	1	1	1	1	5	2
20140530	1	1	3	2	2	1	0	0	0	0	5	2
20141009	1	1	4	2	2	2	0	0	1	1	5	0
20140108	1	1	4	2	2	2	0	1	0	1	5	2
20141210	2	1	4	2	2	2	0	1	1	0	5	2
20140106	2	1	1	2	3	2	0	1	1	0	5	0
20140108	2	1	3	2	2	2	1	0	0	0	5	2
20141128	2	1	2	2	1	3	1	1	0	1	5	0
20140818	1	1	1	2	1	2	0	0	1	0	5	0
20140707	1	1	1	2	2	2	0	0	0	0	5	0
20140801	2	1	3	2	2	2	1	0	0	0	5	2
20141210	2	1	1	2	2	2	0	0	0	0	5	0
20140519	2	1	1	2	2	2	0	1	0	0	5	2
20141128	1	1	1	2	3	2	0	0	1	0	5	2
20140627	2	1	3	2	2	2	0	1	0	0	5	2
20140107	1	1	1	2	2	2	0	0	0	0	5	0
20140806	1	1	4	2	2	2	0	1	1	1	5	2
20141009	2	1	4	2	2	3	0	0	0	0	5	2
20141128	1	1	1	2	1	2	0	0	1	0	5	0
20140701	1	1	3	2	2	2	0	1	1	0	5	0
20141024	1	1	3	2	2	2	1	0	0	1	5	2
20140710	2	1	2	2	2	2	1	1	0	0	5	0
20140709	1	1	4	2	2	2	0	1	0	1	5	2
20140106	1	1	1	2	2	2	0	0	1	0	5	2
20140116	2	1	4	2	2	2	1	1	0	0	5	2
20140124	2	1	2	2	2	2	0	1	1	0	5	2
20141114	2	1	4	2	2	2	0	0	0	0	5	2
20140603	2	1	3	2	2	2	1	0	0	0	5	2
20140409	1	1	3	2	3	1	0	1	1	0	5	0
20140404	1	1	4	2	2	2	1	0	0	0	5	2
20140113	1	1	2	2	2	3	1	1	1	0	5	2
20140106	2	1	3	2	2	2	1	1	0	0	5	0
20140519	1	1	4	2	3	2	1	0	0	1	5	0
20140519	1	1	4	2	2	2	1	0	0	0	4	0
20141103	2	1	4	2	3	2	0	1	1	0	4	2
20140107	2	1	1	2	2	2	0	1	0	0	4	2
20141128	2	1	1	2	1	2	0	1	1	0	4	2
20140805	2	1	2	2	2	2	0	1	0	0	4	0
20140709	1	1	3	2	3	2	0	0	0	0	4	2
20140107	2	1	2	2	2	2	1	1	1	0	4	0
20140115	1	1	1	2	2	2	1	0	0	0	4	2
20140414	1	1	1	2	3	2	1	1	0	1	4	2
20140313	1	1	1	2	2	2	0	0	1	0	4	0
20140715	1	1	3	2	3	2	0	0	0	0	4	0
20140110	1	1	4	2	3	2	0	1	1	0	4	0
20141128	2	1	1	2	2	2	0	1	0	0	4	2
20140519	1	1	1	2	2	2	0	0	1	1	4	2
20141128	2	1	1	2	2	2	1	1	1	0	4	2
20140523	2	1	4	2	2	2	0	1	0	0	4	0
20140108	1	1	2	2	2	2	0	1	0	0	4	0
20141210	2	1	1	2	2	2	1	1	0	0	4	2
20140108	1	1	1	2	2	2	1	1	0	1	4	2
20141031	1	1	3	2	2	2	0	0	1	0	4	0
20141104	1	1	3	2	3	2	0	1	0	0	4	2
20140707	2	1	1	2	2	2	1	1	1	1	4	0
20140124	1	1	3	2	2	2	0	1	1	0	4	2
20140519	1	1	4	2	2	2	0	1	0	0	4	0
20140114	2	1	1	2	2	2	0	1	0	0	4	2
20140116	1	1	4	2	3	2	0	0	0	0	4	2
20140106	2	1	1	2	2	2	1	1	0	1	4	0
20140410	1	1	2	2	2	2	1	0	0	0	4	2
20140704	1	1	2	2	2	3	1	1	0	0	4	0
20140107	1	1	1	2	2	2	1	0	1	0	4	0
20140110	1	1	3	2	2	2	1	1	1	1	4	2
20140410	1	1	1	2	3	2	0	0	0	0	4	0
20140519	2	1	3	2	3	2	1	1	0	0	4	0
20140107	2	1	2	2	3	2	1	0	0	0	4	2
20140117	1	1	4	2	2	2	0	0	1	0	4	0
20140711	2	1	4	2	3	2	0	1	0	0	4	2
20141117	1	1	4	2	3	2	0	0	0	1	4	2
20140107	2	1	1	2	2	2	0	1	0	0	4	2
20140528	1	1	2	2	2	1	1	0	0	0	4	0
20141126	1	1	3	2	3	2	1	0	1	0	4	2
20140709	2	1	3	2	3	2	1	1	0	1	4	2
20140605	1	1	1	2	3	2	1	0	0	0	4	0
20140519	2	1	4	2	3	2	1	1	0	0	4	2
20140114	1	1	4	2	2	2	0	0	1	0	4	2
20140709	1	1	2	2	2	2	0	0	0	1	4	2
20140404	1	1	3	2	3	3	1	0	1	0	4	2
20140210	1	1	2	2	2	3	0	1	0	1	4	2
20140408	1	1	2	2	3	2	0	1	1	0	4	2
20140124	1	1	2	2	2	1	1	0	0	1	4	0
20140409	1	1	4	2	2	1	1	0	0	0	4	0
20140708	2	1	1	2	2	2	0	0	0	0	4	2
20140113	1	1	1	2	2	2	1	0	0	0	4	2
20140722	2	1	1	2	3	2	0	1	1	1	4	0
20140108	1	1	1	2	3	2	1	0	0	1	4	2
20140408	1	1	3	2	3	2	1	0	0	0	4	2
20140721	1	1	2	2	2	2	0	0	1	0	4	0
20140408	2	1	2	2	3	3	0	1	1	0	4	0
20140110	2	1	1	2	3	2	0	1	1	0	4	0
20140722	1	1	3	2	2	2	0	1	0	0	4	0
20140519	1	1	1	2	3	1	0	1	0	0	4	0
20140107	1	1	2	2	2	3	1	0	1	0	4	2
20140410	2	1	4	2	3	2	0	1	0	0	4	0
20140703	2	1	2	2	3	2	0	1	1	0	4	2
20140106	1	1	4	2	4	1	0	0	0	0	4	2
20140327	2	1	2	2	3	2	0	0	0	0	4	2
20140418	2	1	4	2	2	2	1	0	0	1	4	0
20140108	1	1	1	2	3	1	1	0	0	0	4	2
20140828	2	1	1	2	2	2	0	1	0	0	4	0
20140106	2	1	2	2	3	3	1	0	1	0	4	2
20140114	1	1	4	2	3	2	1	1	0	0	4	2
20141128	2	1	3	2	3	2	0	1	0	0	4	2
20140722	1	1	2	2	2	2	0	0	1	0	4	2
20140116	1	1	1	2	2	2	1	1	1	1	4	2
20140410	1	1	1	2	2	2	0	0	0	0	4	2
20140617	2	1	3	2	2	2	0	0	0	1	4	2
20140625	2	1	3	2	3	3	0	0	1	1	4	2
20140828	1	1	4	2	3	1	1	1	0	0	4	2
20140402	2	1	1	2	3	2	1	0	0	0	4	2
20140404	2	1	2	2	3	2	0	0	1	0	4	2
20140613	2	1	3	2	3	2	1	0	1	0	4	2
20141024	1	1	1	2	3	1	1	0	0	0	4	2
20140519	2	1	3	2	3	2	0	1	0	1	4	2
20140904	2	1	4	2	3	2	1	1	1	0	4	0
20140731	1	1	4	2	3	2	1	0	0	0	4	2
20141126	2	1	1	2	1	2	0	1	0	0	3	0
20140401	1	1	2	2	3	1	0	1	1	0	3	2
20140711	2	1	4	2	2	2	0	1	0	0	3	0
20140707	1	1	1	2	2	2	1	1	0	0	3	2
20140409	2	1	4	2	3	2	0	1	1	1	3	0
20140723	2	1	4	2	2	2	1	0	0	0	3	0
20140109	1	1	1	2	2	1	0	1	0	0	3	2
20140827	2	1	3	2	3	2	1	1	0	1	3	0
20140808	2	1	1	2	2	1	0	0	1	0	3	2
20140707	2	1	1	2	2	2	1	1	0	0	3	2
20140619	1	1	1	2	2	2	1	0	0	0	3	0
20140519	2	1	3	2	2	2	0	1	1	0	3	0
20140711	1	1	1	2	2	1	1	0	0	0	3	2
20140114	1	1	2	2	2	1	1	0	0	0	3	0
20140519	1	1	2	2	2	2	0	0	0	0	3	0
20140815	1	1	1	2	2	1	0	0	0	0	3	0
20140903	2	1	1	2	2	1	0	1	0	0	2	2
20140108	1	1	1	2	3	1	0	1	0	0	2	0
20140415	2	1	3	2	4	1	0	0	0	0	2	2
20141104	1	1	3	2	2	2	1	1	0	0	6	0
20140828	2	1	4	2	1	2	1	1	0	0	6	0
20140807	1	1	2	2	1	2	0	0	0	0	6	0
20140214	1	1	1	2	3	2	0	1	0	0	6	0
20140708	1	1	4	2	1	2	0	1	0	0	6	0
20140722	2	1	3	2	2	2	0	1	0	1	6	2
20140708	1	1	1	2	3	2	1	0	1	0	6	2
20140701	1	1	3	2	1	3	1	0	0	1	6	0
20140414	2	1	4	2	4	2	0	1	1	0	6	2
20140925	1	1	1	2	2	2	0	1	0	1	6	0
20140630	1	1	2	2	4	3	1	1	0	0	6	0
20140807	1	1	1	2	2	2	1	0	0	0	6	0
20140702	1	1	4	2	2	2	0	0	0	0	6	2
20140804	1	1	1	2	3	2	1	0	0	0	6	0
20140318	2	1	3	2	1	2	0	1	0	0	6	2
20140923	1	1	3	2	2	2	0	0	0	0	6	0
20140926	1	1	1	2	2	2	1	1	0	0	6	2
20140414	1	1	2	2	2	2	1	1	0	0	6	0
20140415	1	1	4	2	3	2	0	0	0	0	6	0
20140415	2	1	2	2	2	2	0	1	0	0	6	0
20140418	1	1	1	2	2	2	0	1	0	1	6	2
20140416	1	1	3	2	2	2	0	0	0	0	6	0
20140414	1	1	2	2	3	2	0	0	0	0	6	0
20141020	1	1	3	2	2	2	0	0	0	0	6	0
20140708	1	1	4	2	3	2	1	0	0	1	6	2
20140806	2	1	2	2	3	2	1	1	1	0	6	0
20140915	1	1	4	2	2	2	1	0	0	1	6	0
20140704	1	1	1	2	1	2	1	0	0	0	6	2
20140708	2	1	3	2	1	2	1	1	0	1	6	2
20140708	1	1	2	2	3	2	1	0	0	1	6	2
20141203	1	1	4	2	3	2	1	0	1	1	6	2
20140317	1	1	2	2	4	2	1	1	1	1	6	0
20140113	1	1	2	2	2	2	1	0	1	0	6	0
20140414	1	1	2	2	3	2	0	1	0	0	6	0
20140828	1	1	1	2	2	2	0	1	0	0	6	0
20140319	1	1	4	2	4	2	1	1	0	0	6	2
20140808	2	1	1	2	2	2	0	0	1	0	6	2
20140915	1	1	1	2	2	2	0	0	0	1	6	2
20140617	1	1	2	2	2	3	1	0	1	1	6	0
20140212	1	1	1	2	2	2	1	0	0	1	6	2
20140708	1	1	4	2	2	2	1	1	0	1	6	0
20141210	1	1	4	2	2	2	0	0	0	0	6	0
20140320	2	1	3	2	4	2	0	0	1	0	6	2
20140519	2	1	1	2	3	2	1	1	0	0	6	0
20140701	1	1	3	2	4	3	1	1	1	1	6	0
20140701	2	1	1	2	1	3	0	0	0	0	6	0
20140828	2	1	1	2	1	2	1	1	0	0	6	0
20140415	2	1	4	2	3	2	0	1	0	0	6	2
20141021	2	1	1	2	4	2	1	1	1	0	6	2
20140925	1	1	1	2	3	2	0	0	1	0	6	0
20140630	1	1	3	2	3	2	0	0	1	0	6	0
20140417	2	1	4	2	1	2	1	0	0	0	6	0
20140402	2	1	4	2	1	2	0	0	0	0	6	0
20140805	2	1	3	2	2	2	1	1	0	0	6	2
20140723	2	1	4	2	2	3	1	0	1	0	6	2
20140925	2	1	2	2	2	2	0	1	1	1	5	2
20141103	1	1	2	2	3	2	0	0	1	0	5	2
20140318	2	1	4	2	4	2	1	1	0	1	5	2
20140213	1	1	3	2	2	2	1	0	1	0	5	2
20140711	1	1	4	2	4	2	1	1	0	0	5	0
20140418	1	1	4	2	3	2	1	0	0	1	5	0
20140924	1	1	2	2	3	2	0	0	0	1	5	0
20140113	1	1	3	2	3	2	0	1	0	1	5	0
20141009	2	1	3	2	2	3	0	0	1	0	5	2
20140212	1	1	4	2	2	2	1	0	0	1	5	0
20141212	1	1	1	2	2	2	1	1	1	1	5	0
20140603	1	1	3	2	3	2	1	0	0	0	5	2
20141212	1	1	4	2	3	2	1	0	1	0	5	0
20140211	2	1	2	2	2	2	0	1	1	0	5	2
20141011	1	1	1	2	1	2	1	0	1	1	5	2
20140416	1	1	1	2	3	2	1	0	0	0	5	2
20141021	2	1	2	2	1	2	0	1	0	0	5	2
20141212	2	1	3	2	3	2	0	1	0	0	5	2
20140805	2	1	1	2	2	2	1	1	0	1	5	2
20140415	1	1	1	2	2	1	1	0	0	1	5	2
20140701	1	1	2	2	2	2	0	1	1	0	5	0
20140630	1	1	2	2	2	1	1	1	0	0	5	0
20140702	2	1	4	2	3	2	1	1	1	0	5	2
20140416	1	1	2	2	2	2	0	0	0	1	5	0
20140924	2	1	3	2	2	2	0	0	0	1	5	2
20141009	2	1	3	2	2	2	1	1	1	0	5	2
20140113	2	1	1	2	2	2	0	1	1	1	5	2
20140708	2	1	2	2	3	2	0	1	1	0	5	0
20140416	1	1	4	2	3	2	1	1	1	0	5	2
20140113	2	1	1	2	2	1	0	0	0	0	5	0
20141021	1	1	3	2	2	2	0	1	0	0	5	0
20140708	2	1	3	2	1	2	1	0	1	0	5	0
20140414	1	1	3	2	2	1	0	1	0	0	5	0
20140924	2	1	1	2	2	2	1	1	1	0	5	0
20140806	1	1	3	2	1	2	1	0	1	0	5	0
20140815	1	1	1	2	2	2	0	0	1	0	5	0
20141212	1	1	1	2	2	2	0	0	1	0	5	0
20140418	2	1	4	2	2	2	1	1	0	1	5	2
20141204	1	1	1	2	3	2	1	0	1	1	5	2
20140701	2	1	4	2	2	3	0	1	1	0	5	0
20140403	1	1	1	2	1	2	1	1	0	0	5	0
20140310	2	1	2	2	2	3	0	0	0	0	5	2
20140926	2	1	1	2	2	2	0	1	0	1	5	2
20140926	1	1	1	2	2	2	0	1	0	0	5	0
20140417	2	1	1	2	2	2	1	0	1	1	5	2
20140924	2	1	2	2	2	2	1	1	0	0	5	2
20140630	1	1	2	2	2	2	1	1	0	1	5	2
20140113	1	1	4	2	2	2	1	1	1	1	5	2
20140710	1	1	4	2	2	2	1	1	1	0	5	0
20140806	2	1	3	2	2	2	0	0	0	0	5	2
20140417	1	1	1	2	2	2	1	0	0	0	5	2
20140417	1	1	4	2	2	3	1	1	0	0	5	0
20140915	2	1	2	2	1	2	1	0	1	0	5	2
20140702	1	1	2	2	2	2	0	0	0	0	5	2
20141124	1	1	3	2	2	2	1	0	0	0	5	0
20140708	1	1	3	2	2	2	1	0	0	1	5	2
20141011	2	1	1	2	1	2	0	0	0	0	5	2
20140807	1	1	1	2	2	2	0	0	1	0	5	0
20140708	1	1	4	2	2	2	1	1	0	0	5	0
20140813	1	1	4	2	2	2	0	0	1	0	5	0
20140416	1	1	4	2	2	2	0	0	0	0	5	2
20140122	1	1	3	2	2	2	0	0	0	1	5	0
20140827	2	1	1	2	2	2	0	0	0	0	5	0
20140211	2	1	3	2	2	2	1	1	0	0	5	2
20140416	2	1	3	2	2	2	0	1	1	1	5	2
20140926	1	1	1	2	2	2	0	0	0	0	5	0
20140630	2	1	4	2	2	2	0	1	1	1	5	0
20140210	1	1	4	2	2	2	1	0	1	1	5	2
20141021	2	1	3	2	2	2	1	1	1	0	5	0
20140418	1	1	1	2	2	2	0	0	1	1	5	0
20140806	1	1	3	2	2	1	0	0	1	0	5	2
20140415	1	1	3	2	2	2	0	1	0	0	5	2
20140418	1	1	2	2	2	2	0	1	0	0	5	2
20140805	2	1	4	2	2	2	0	1	0	0	5	2
20140807	2	1	1	2	1	2	0	1	1	1	5	2
20140829	1	1	4	2	2	2	0	1	1	0	5	0
20140804	1	1	1	2	2	2	1	1	0	0	5	2
20140805	2	1	4	2	2	2	1	1	0	0	5	0
20141009	1	1	3	2	2	2	1	0	1	0	5	2
20141021	1	1	1	2	1	2	0	1	0	0	5	0
20140416	1	1	4	2	2	2	0	0	1	0	5	0
20140213	2	1	1	2	2	2	0	0	0	0	5	2
20140122	1	1	1	2	1	2	0	0	0	1	5	0
20141021	1	1	1	2	1	2	0	1	0	0	5	0
20140812	2	1	1	2	2	2	0	1	1	0	5	0
20140804	2	1	1	2	2	2	0	1	0	0	5	2
20140924	2	1	1	2	2	2	0	0	1	0	5	2
20141103	2	1	4	2	2	2	1	1	1	0	5	2
20140815	2	1	1	2	2	2	0	1	1	0	5	2
20140318	1	1	2	2	3	2	1	0	0	0	5	0
20140414	1	1	2	2	2	2	0	0	0	0	5	0
20140403	2	1	1	2	1	2	1	1	1	1	5	2
20141021	1	1	1	2	2	2	0	0	1	0	5	2
20140619	1	1	1	2	2	2	0	0	0	0	5	2
20140924	1	1	1	2	2	2	0	0	0	0	5	2
20140213	1	1	3	2	4	2	1	0	1	1	5	2
20141021	1	1	1	2	1	2	1	0	0	0	5	0
20140828	2	1	4	2	2	2	0	0	0	0	5	0
20140214	1	1	1	2	2	2	1	1	0	1	5	0
20140924	2	1	1	2	2	2	1	1	1	0	5	0
20140417	1	1	2	2	2	2	0	1	1	0	5	2
20140922	2	1	2	2	2	2	0	1	1	0	5	2
20140213	1	1	3	2	2	2	1	1	1	1	5	0
20140926	1	1	1	2	2	2	0	0	0	0	5	2
20140702	2	1	2	2	2	2	1	1	0	0	5	2
20140418	1	1	3	2	2	3	1	0	1	0	5	0
20140519	2	1	2	2	3	3	0	1	0	0	5	0
20141021	2	1	1	2	2	2	1	1	0	0	5	0
20140722	1	1	3	2	2	2	0	0	1	0	5	2
20140122	1	1	1	2	2	1	1	0	0	1	5	0
20140418	1	1	3	2	2	2	0	1	0	0	5	0
20140210	1	1	2	2	2	3	1	0	1	1	5	0
20140417	2	1	2	2	3	2	0	0	1	0	5	2
20141104	1	1	4	2	2	2	0	1	0	0	5	2
20140924	2	1	2	2	2	2	1	1	0	0	5	2
20140708	1	1	1	2	1	2	1	1	0	1	5	2
20140715	2	1	3	2	3	2	0	0	0	1	5	2
20140617	2	1	2	2	2	3	0	1	1	0	5	0
20140213	2	1	2	2	2	2	1	1	0	0	5	2
20140929	2	1	4	2	2	2	0	0	1	1	4	2
20140702	1	1	4	2	2	2	0	0	1	1	4	2
20141020	2	1	4	2	2	2	1	1	1	0	4	0
20141204	2	1	4	2	3	2	0	1	0	0	4	2
20141020	1	1	1	2	3	2	0	0	0	0	4	2
20140318	1	1	2	2	2	3	1	1	0	1	4	2
20140113	2	1	3	2	2	2	1	1	1	1	4	2
20140417	1	1	3	2	3	3	0	0	1	0	4	0
20140910	1	1	1	2	3	1	0	0	0	0	4	0
20140704	1	1	2	2	2	2	0	1	1	1	4	2
20140318	1	1	1	2	2	2	1	0	1	0	4	0
20140514	1	1	1	2	3	2	0	0	0	0	4	2
20140701	1	1	2	2	2	2	0	1	0	0	4	0
20140916	2	1	2	2	2	2	1	0	0	1	4	2
20140415	2	1	1	2	3	2	0	1	1	0	4	2
20140630	2	1	3	2	3	2	1	0	1	1	4	0
20141128	1	1	2	2	3	2	0	1	1	0	4	0
20140418	1	1	4	2	2	2	1	0	0	1	4	2
20141024	1	1	3	2	3	3	1	0	0	0	4	0
20140113	1	1	2	2	3	2	0	1	1	1	4	2
20140211	1	1	1	2	3	2	0	0	1	1	4	2
20140211	1	1	4	2	2	2	0	0	1	0	4	2
20140318	2	1	3	2	1	3	0	1	1	1	4	0
20140418	2	1	3	2	2	2	0	1	0	0	4	2
20140828	1	1	2	2	3	2	1	1	0	1	4	2
20140321	1	1	1	2	2	2	0	0	0	0	4	2
20140415	2	1	1	2	3	3	1	1	1	1	4	0
20140924	1	1	1	2	3	2	0	0	0	0	4	2
20140912	2	1	3	2	2	2	0	1	0	0	4	2
20140217	2	1	3	2	2	2	0	1	0	0	4	0
20141203	1	1	4	2	2	3	1	0	0	0	4	2
20140701	1	1	1	2	2	1	0	1	0	0	4	0
20140115	2	1	4	2	2	2	1	0	1	0	4	2
20140404	2	1	3	2	3	2	0	0	1	0	4	2
20140416	1	1	2	2	2	1	1	0	0	0	4	2
20140723	2	1	3	2	3	2	0	0	1	0	4	0
20141121	2	1	3	2	3	2	1	0	0	0	4	2
20140318	2	1	4	2	1	2	1	1	0	0	4	0
20140416	1	1	2	2	2	2	0	1	0	1	4	2
20140317	2	1	2	2	3	2	0	1	0	0	4	2
20140805	2	1	3	2	3	2	1	1	1	0	4	2
20140425	1	1	3	2	2	1	1	0	0	0	4	2
20140214	2	1	1	2	2	2	1	1	1	1	4	0
20140418	1	1	1	2	2	2	1	1	0	0	4	0
20141021	1	1	4	2	3	3	0	0	0	0	4	2
20140701	1	1	3	2	2	2	0	0	0	1	4	2
20141212	1	1	1	2	2	2	1	0	1	0	4	0
20140414	1	1	4	2	4	2	1	0	1	0	4	2
20140702	1	1	1	2	3	1	1	1	1	0	4	2
20140708	2	1	1	2	1	2	0	1	0	0	4	2
20141020	1	1	4	2	2	2	0	0	1	0	4	2
20140806	1	1	4	2	3	1	0	0	1	1	4	0
20140318	2	1	1	2	2	2	0	0	1	0	4	2
20140702	1	1	4	2	2	2	1	1	1	1	4	2
20141027	1	1	1	2	3	1	0	0	0	0	4	0
20141103	2	1	4	2	3	2	1	1	0	0	4	2
20140721	1	1	4	2	2	2	1	1	0	0	4	2
20141010	2	1	4	2	2	2	0	0	0	0	4	2
20140417	1	1	4	2	2	2	0	1	0	0	4	2
20141204	1	1	2	2	3	2	0	0	1	0	4	2
20141203	2	1	1	2	2	2	1	0	0	1	4	2
20140117	1	1	3	2	3	2	1	0	1	0	4	2
20140414	1	1	2	2	2	2	0	1	1	0	4	0
20140708	2	1	1	2	3	2	1	1	0	0	4	2
20140326	2	1	2	2	2	3	0	0	1	0	4	2
20140520	2	1	1	2	2	2	0	0	0	0	4	0
20141103	2	1	4	2	3	2	0	0	0	0	4	0
20140317	2	1	2	2	3	2	0	0	0	0	4	0
20141021	2	1	2	2	2	2	1	1	1	0	4	2
20140414	1	1	1	2	2	1	1	0	0	1	4	2
20140416	2	1	1	2	2	2	0	0	1	0	4	0
20140415	1	1	2	2	2	2	1	0	0	0	4	2
20140630	2	1	2	2	3	2	0	1	1	1	4	2
20140924	2	1	1	2	3	2	0	1	0	0	4	0
20141103	1	1	2	2	2	2	1	0	0	1	4	0
20140113	1	1	3	2	3	2	0	0	1	0	4	0
20141027	2	1	1	2	2	2	0	1	0	0	4	0
20140708	2	1	4	2	3	3	0	0	0	0	4	0
20140526	2	1	1	2	2	2	0	0	0	0	4	0
20140630	2	1	3	2	3	2	1	0	1	0	4	2
20141009	1	1	4	2	2	2	0	1	1	0	4	0
20140819	1	1	1	2	3	3	1	1	0	0	4	2
20140212	2	1	2	2	3	2	0	0	1	0	4	2
20140603	2	1	4	2	2	3	0	0	1	0	4	2
20141021	2	1	1	2	2	2	1	1	1	1	4	0
20140122	2	1	1	2	2	2	0	0	0	0	4	0
20140922	2	1	1	2	3	2	1	1	1	0	4	2
20140402	1	1	4	2	3	2	0	0	0	0	4	2
20140410	2	1	4	2	3	2	1	1	1	0	4	2
20140805	1	1	3	2	2	1	1	1	0	0	4	2
20140317	1	1	1	2	2	2	0	1	1	0	4	2
20140807	1	1	1	2	2	3	1	0	0	0	4	0
20141009	2	1	1	2	2	2	0	1	0	0	4	0
20141104	1	1	4	2	4	2	1	0	0	1	4	2
20140701	1	1	1	2	1	1	1	1	1	0	4	2
20140414	2	1	4	2	3	2	0	1	1	0	4	2
20140317	2	1	2	2	2	3	0	1	0	0	4	2
20141212	2	1	3	2	2	2	0	1	0	0	4	2
20140526	2	1	1	2	3	2	0	0	0	0	4	0
20140924	1	1	2	2	2	2	0	0	0	0	4	0
20140701	2	1	3	2	3	2	0	0	0	0	4	0
20140416	2	1	4	2	2	2	1	0	0	0	4	2
20141020	2	1	1	2	2	2	1	1	1	0	4	2
20140804	2	1	3	2	2	2	1	1	1	1	4	2
20140728	1	1	4	2	3	2	0	0	1	0	4	0
20140214	1	1	3	2	3	1	1	0	0	0	4	2
20141128	2	1	4	2	3	2	0	1	1	0	4	2
20140708	2	1	3	2	3	3	0	1	1	0	4	0
20140418	1	1	1	2	3	2	1	0	1	1	4	2
20140703	1	1	3	2	3	2	1	0	1	0	3	0
20140430	1	1	1	2	1	2	0	0	0	0	3	0
20140214	1	1	4	2	2	3	1	1	0	0	3	2
20140708	2	1	3	2	3	2	0	1	1	0	3	2
20141020	1	1	1	2	2	2	1	1	0	1	3	0
20140828	2	1	3	2	3	2	0	0	0	0	3	0
20140530	2	1	1	2	2	2	1	1	0	0	3	0
20140317	1	1	1	2	4	2	0	0	0	0	3	2
20140414	2	1	3	2	3	2	1	0	1	0	3	0
20140724	2	1	3	2	2	2	0	0	1	0	3	2
20140415	2	1	4	2	3	2	0	0	0	0	3	0
20140708	1	1	3	2	3	2	1	1	0	0	3	2
20140928	2	1	3	2	3	2	1	1	1	0	3	0
20140708	1	1	1	2	2	2	0	1	0	0	3	2
20140924	2	1	1	2	3	2	0	0	1	0	2	0
20140905	2	1	2	2	4	1	0	0	0	0	2	2
20140928	1	1	1	2	3	2	0	0	0	0	2	2
20140418	1	1	4	2	3	1	1	1	0	0	2	2
20140319	1	1	2	2	4	1	0	0	0	0	2	0
20140115	2	1	3	2	3	1	0	1	1	0	2	0
20140828	1	1	3	2	3	1	0	0	1	0	2	2
20140415	2	1	1	2	4	1	0	1	0	0	2	0
20140416	2	1	1	2	4	1	0	0	0	0	1	2
20141009	1	1	4	2	1	1	0	0	1	0	1	0
20140327	2	1	1	2	1	3	0	0	1	0	6	2
20140922	2	1	2	2	1	2	0	1	0	0	6	0
20140520	1	1	3	2	4	2	0	1	0	0	6	0
20140211	2	1	2	2	1	2	1	1	0	0	6	2
20140827	1	1	4	2	2	2	0	1	0	0	6	0
20140806	1	1	4	2	4	2	0	0	0	1	6	0
20140526	1	1	4	2	1	2	0	0	1	0	6	2
20140116	1	1	1	2	3	2	0	0	0	0	6	2
20140928	1	1	1	2	3	2	0	0	1	1	6	2
20141011	2	1	3	2	1	2	1	0	0	0	6	2
20140520	1	1	4	2	3	2	0	1	0	1	6	0
20140520	1	1	1	2	2	2	0	1	0	0	6	0
20141204	1	1	2	2	2	2	0	0	0	0	6	0
20141010	2	1	1	2	2	2	0	0	1	0	6	2
20140703	1	1	1	2	2	2	1	0	1	1	6	2
20140915	2	1	1	2	2	2	0	0	0	1	6	2
20140804	1	1	2	2	3	2	1	0	0	1	6	0
20140116	2	1	1	2	1	2	0	1	1	0	6	2
20140725	1	1	1	2	2	2	0	0	0	0	6	0
20140520	2	1	4	2	2	2	1	1	0	1	5	2
20140213	1	1	4	2	4	2	1	0	1	0	5	2
20140107	1	1	3	2	2	2	0	1	0	0	5	2
20140916	1	1	4	2	2	2	1	0	0	0	5	2
20140319	1	1	4	2	3	2	1	0	0	1	5	0
20141011	2	1	1	2	2	2	0	1	0	0	5	2
20140707	1	1	3	2	2	2	0	0	1	0	5	2
20141010	1	1	4	2	1	2	0	0	1	1	5	2
20141126	2	1	3	2	2	2	1	1	0	0	5	2
20140922	1	1	3	2	2	2	0	0	0	1	5	2
20140923	2	1	3	2	3	2	0	1	0	0	5	0
20140314	1	1	1	2	2	2	0	0	0	1	5	2
20140903	1	1	2	2	2	2	1	0	1	0	5	2
20140915	2	1	1	2	1	2	1	0	0	0	5	2
20140402	2	1	1	2	1	2	1	1	0	0	5	2
20140929	1	1	4	2	2	2	1	0	1	0	5	2
20140903	1	1	2	2	2	2	1	0	0	0	5	2
20140604	2	1	3	2	3	2	1	1	0	0	5	0
20141011	2	1	4	2	2	2	0	1	1	0	5	0
20140829	2	1	1	2	2	3	0	1	1	0	5	2
20140117	1	1	4	2	2	2	1	0	1	0	5	2
20140408	2	1	4	2	2	2	1	1	0	0	5	2
20141008	1	1	3	2	2	2	0	0	0	0	5	2
20140930	1	1	3	2	2	2	1	0	1	0	5	2
20141010	1	1	1	2	2	2	1	0	1	0	5	2
20140604	1	1	1	2	2	2	0	0	1	0	5	2
20140829	1	1	1	2	1	1	1	1	0	1	5	0
20140916	1	1	3	2	4	2	0	0	0	0	5	0
20141210	1	1	4	2	4	2	1	0	0	0	5	0
20140923	1	1	2	2	2	2	0	1	1	0	5	2
20141030	2	1	1	2	1	2	0	1	0	0	5	0
20141024	2	1	4	2	2	2	0	0	1	0	5	0
20141011	1	1	1	2	2	2	1	0	0	1	5	2
20141114	1	1	3	2	2	2	1	0	0	0	5	2
20140630	1	1	3	2	2	2	1	0	0	0	5	0
20140725	1	1	4	2	2	2	1	0	1	0	5	0
20140827	2	1	1	2	2	2	0	0	1	0	5	2
20140707	2	1	3	2	2	2	0	0	1	0	5	2
20140402	1	1	1	2	2	2	0	1	0	0	5	2
20140210	2	1	1	2	2	2	0	1	0	1	5	2
20140707	2	1	4	2	3	2	0	1	1	0	5	0
20141127	2	1	2	2	3	2	1	1	0	1	5	2
20140411	2	1	4	2	2	2	0	0	0	1	5	2
20140915	2	1	1	2	2	2	0	0	1	1	5	2
20140924	2	1	1	2	2	2	0	0	1	1	5	0
20140214	1	1	2	2	3	2	0	0	1	0	5	2
20141112	2	1	4	2	2	2	1	0	0	0	4	2
20141011	2	1	1	2	2	2	1	1	0	0	4	2
20141030	2	1	1	2	2	2	0	1	1	0	4	2
20140806	1	1	4	2	2	2	0	0	0	0	4	0
20140829	2	1	3	2	3	2	0	1	0	0	4	2
20140604	2	1	1	2	2	2	0	1	0	0	4	2
20141011	2	1	4	2	3	2	1	1	1	1	4	2
20141010	1	1	4	2	2	2	0	0	1	0	4	0
20140930	1	1	2	2	4	2	1	0	0	0	4	2
20140923	2	1	2	2	3	2	0	1	0	0	4	0
20141011	1	1	3	2	2	2	0	1	1	0	4	2
20140218	2	1	4	2	3	2	1	1	0	1	4	2
20140829	1	1	4	2	3	2	0	0	1	1	4	0
20140806	2	1	1	2	3	2	0	0	1	0	4	2
20141010	2	1	3	2	3	2	0	1	0	0	4	2
20140814	1	1	4	2	4	2	0	1	0	0	4	2
20140630	1	1	4	2	4	2	0	1	1	0	4	0
20141114	2	1	4	2	3	2	0	0	1	0	4	0
20140520	1	1	4	2	3	3	0	1	1	0	4	0
20140806	1	1	1	2	2	2	0	0	1	0	4	0
20140922	2	1	3	2	3	2	0	0	1	0	4	2
20140304	1	1	2	2	2	2	0	0	1	1	4	0
20140829	1	1	4	2	3	2	0	1	1	0	4	0
20141011	1	1	1	2	2	2	1	0	1	1	4	2
20140723	1	1	4	2	3	2	0	0	1	0	4	0
20140529	1	1	3	2	4	2	1	0	1	0	4	2
20140402	2	1	1	2	3	2	0	1	0	0	4	2
20141212	1	1	4	2	2	2	1	0	1	1	4	2
20140704	1	1	3	2	2	1	1	0	0	1	4	2
20140604	2	1	1	2	3	2	0	0	1	0	4	2
20140923	1	1	3	2	3	2	1	0	0	0	4	2
20140110	1	1	2	2	3	3	1	0	0	0	4	2
20140922	2	1	2	2	2	2	0	1	0	0	4	2
20140709	2	1	3	2	3	2	0	1	0	1	4	2
20140603	1	1	1	2	3	1	0	1	0	1	4	2
20141011	1	1	4	2	3	1	0	0	0	1	4	2
20140410	1	1	4	2	3	3	1	0	0	1	3	2
20140414	2	1	3	2	3	2	0	0	0	0	3	2
20141121	2	1	1	2	2	2	0	1	1	0	3	0
20140731	2	1	1	2	3	2	0	1	1	0	3	0
20140915	1	1	1	2	3	1	1	0	0	0	2	2
20140704	2	1	1	2	4	1	0	1	0	0	2	0
20140520	2	1	1	2	2	1	1	1	0	0	2	2
20140829	2	1	4	2	4	1	1	1	1	0	2	0
20140827	1	1	4	2	3	1	1	0	1	0	1	0
20140916	2	1	1	2	1	2	0	0	0	0	6	2
20140317	1	1	4	2	4	3	1	0	1	0	6	0
20140219	2	1	2	2	3	2	0	1	1	0	6	2
20140528	1	1	4	2	4	2	1	0	0	0	6	0
20140318	1	1	2	2	4	2	0	0	0	0	6	0
20140219	1	1	1	2	4	2	0	0	1	0	6	2
20140319	1	1	4	2	4	2	0	0	0	0	6	0
20140430	1	1	4	2	1	2	0	1	0	0	6	2
20140528	1	1	3	2	2	2	0	0	0	0	6	0
20140320	1	1	4	2	3	2	0	0	0	0	6	0
20141113	1	1	1	2	2	2	1	0	1	0	6	2
20140722	2	1	3	2	2	2	1	0	1	1	6	2
20140527	1	1	4	2	2	2	1	0	0	0	6	2
20141124	1	1	4	2	4	2	1	0	0	1	6	2
20140916	1	1	4	2	3	2	1	0	0	0	6	2
20141113	2	1	1	2	3	2	0	1	0	0	6	2
20140321	1	1	2	2	2	2	0	0	1	0	6	0
20140723	1	1	4	2	4	2	0	0	0	0	6	0
20140528	1	1	1	2	1	2	1	0	0	0	6	2
20140528	1	1	3	2	2	2	1	0	1	0	6	0
20140723	1	1	3	2	4	2	0	0	1	0	6	0
20140321	1	1	2	2	3	2	0	0	1	0	6	0
20140528	2	1	1	2	1	2	1	0	0	0	6	2
20141009	2	1	3	2	4	2	1	0	1	0	6	0
20140528	1	1	1	2	1	2	0	0	1	1	6	0
20141113	1	1	1	2	2	2	0	0	1	0	6	2
20140321	2	1	2	2	1	2	1	1	0	0	6	2
20140404	1	1	2	2	3	2	1	0	1	1	6	0
20140528	1	1	4	2	2	2	0	0	1	0	5	0
20141113	2	1	1	2	1	2	1	0	0	1	5	2
20140319	1	1	4	2	3	2	1	0	1	0	5	2
20141124	2	1	1	2	2	2	0	0	1	0	5	2
20140528	1	1	1	2	2	2	1	0	0	0	5	2
20140318	1	1	3	2	2	1	1	0	1	0	5	0
20140721	1	1	2	2	3	2	0	0	0	0	5	2
20141112	1	1	2	2	3	2	0	0	1	0	5	2
20141210	1	1	3	2	4	2	0	0	0	0	5	2
20140721	1	1	2	2	2	2	1	0	0	0	5	2
20141124	2	1	4	2	4	2	0	0	1	0	5	2
20140528	2	1	1	2	1	2	0	0	0	0	5	2
20140916	2	1	4	2	2	2	1	0	0	0	5	2
20141114	1	1	4	2	1	2	1	0	0	0	5	2
20140526	1	1	2	2	4	2	0	0	0	0	5	0
20141114	2	1	4	2	1	2	1	0	1	0	5	2
20140526	1	1	3	2	2	2	1	0	0	0	5	2
20140702	2	1	1	2	1	2	1	1	1	0	5	2
20140603	1	1	3	2	2	2	0	0	1	1	5	2
20140723	1	1	4	2	4	2	1	0	1	1	5	2
20140331	2	1	1	2	3	2	0	0	0	0	5	0
20140722	1	1	4	2	3	2	0	1	0	0	5	0
20140530	1	1	1	2	2	2	0	0	1	0	5	2
20140320	1	1	4	2	2	2	1	0	0	0	5	0
20141114	2	1	4	2	2	2	0	0	0	0	5	2
20140320	2	1	4	2	1	2	1	0	0	0	5	0
20140722	1	1	4	2	2	2	0	0	0	1	5	0
20140326	2	1	1	2	2	2	0	0	0	1	5	2
20140718	2	1	1	2	3	2	1	1	0	1	5	2
20140529	1	1	3	2	2	2	0	0	0	0	5	2
20140528	1	1	1	2	3	2	0	0	0	0	5	2
20140514	1	1	2	2	2	2	1	0	0	0	5	2
20140327	1	1	4	2	2	2	0	0	1	0	5	0
20140723	1	1	4	2	2	2	0	0	0	0	5	2
20140528	1	1	1	2	4	2	0	0	0	0	5	2
20140721	2	1	2	2	2	2	1	0	0	0	5	2
20140317	2	1	3	2	2	2	1	0	0	1	5	0
20140722	2	1	2	2	1	3	0	0	0	0	5	2
20140721	1	1	4	2	4	2	0	0	0	0	5	2
20140526	1	1	1	2	3	3	1	0	0	0	5	0
20140806	1	1	4	2	2	2	1	0	0	0	5	2
20140320	1	1	2	2	2	2	0	0	0	0	5	2
20140321	1	1	1	2	4	2	0	0	1	0	5	2
20140915	2	1	2	2	2	2	0	0	1	1	5	2
20140530	1	1	4	2	3	2	1	0	0	0	5	2
20140916	1	1	1	2	2	2	1	0	0	0	5	0
20140320	2	1	4	2	2	2	0	0	1	0	5	2
20140725	1	1	4	2	3	2	0	0	1	1	5	2
20140721	2	1	2	2	2	2	1	0	1	1	5	2
20140319	1	1	3	2	2	2	0	0	0	0	4	2
20140319	2	1	4	2	2	2	1	0	0	0	4	0
20141112	1	1	4	2	3	2	0	0	0	0	4	2
20140528	2	1	4	2	2	2	1	0	0	0	4	2
20141112	1	1	4	2	2	1	0	0	1	0	4	2
20140318	2	1	2	2	1	2	1	0	0	0	4	0
20140528	2	1	4	2	2	2	0	1	1	0	4	2
20140722	2	1	4	2	3	2	1	0	1	1	4	2
20140701	2	1	4	2	3	2	1	1	1	0	4	2
20140924	2	1	3	2	4	2	0	1	1	0	4	2
20141204	1	1	2	2	2	2	1	0	1	0	4	2
20140429	1	1	1	2	2	2	1	0	1	0	4	2
20141117	1	1	4	2	2	2	0	0	1	0	4	0
20140211	1	1	4	2	3	2	1	0	1	1	4	2
20140603	2	1	4	2	3	2	1	0	0	0	4	2
20141011	2	1	4	2	2	2	0	1	1	0	4	2
20140725	2	1	4	2	3	1	1	0	1	0	4	0
20140721	2	1	2	2	2	2	1	0	0	0	4	2
20140924	1	1	4	2	3	2	1	0	1	0	4	2
20140905	1	1	3	2	3	2	1	0	1	0	4	2
20140724	1	1	2	2	1	2	0	0	1	0	4	2
20141113	1	1	1	2	1	2	1	0	1	0	4	2
20141124	1	1	1	2	2	2	0	0	0	0	4	2
20140528	1	1	2	2	2	2	1	0	0	0	4	0
20140409	2	1	1	2	2	2	1	0	1	0	4	2
20140526	1	1	3	2	2	2	1	0	0	0	4	2
20140519	2	1	1	2	3	2	0	1	0	0	4	2
20140529	1	1	2	2	3	2	1	0	0	0	4	0
20140722	2	1	3	2	2	2	0	0	0	0	4	2
20140321	2	1	2	2	2	2	0	0	1	0	4	2
20141124	2	1	1	2	1	2	0	0	1	0	4	2
20140527	1	1	4	2	2	2	0	0	0	0	4	0
20140320	1	1	3	2	2	3	0	0	1	0	4	0
20140321	1	1	2	2	2	2	0	0	0	0	4	0
20140320	1	1	2	2	2	1	0	0	1	0	4	0
20140523	2	1	1	2	3	2	0	0	0	0	4	2
20141112	2	1	4	2	2	2	0	0	0	1	4	2
20140603	1	1	4	2	3	2	0	0	0	0	4	2
20140317	1	1	4	2	3	1	1	0	1	0	4	2
20140530	1	1	3	2	4	2	0	0	1	0	4	2
20141112	2	1	4	2	3	2	0	0	0	0	4	2
20140529	2	1	2	2	2	2	0	0	1	0	4	2
20140722	1	1	4	2	2	2	0	0	0	0	4	0
20140528	1	1	2	2	3	2	0	0	0	0	4	2
20140528	2	1	2	2	2	2	0	0	0	0	4	0
20140319	1	1	3	2	4	3	1	0	1	0	4	2
20140528	2	1	1	2	3	2	0	0	0	0	4	2
20140320	1	1	2	2	3	1	1	0	0	1	4	2
20140722	1	1	3	2	3	2	1	0	0	0	4	2
20140724	2	1	3	2	3	2	0	0	0	0	4	2
20140725	2	1	1	2	2	2	0	0	0	0	4	2
20140526	1	1	4	2	4	2	0	0	1	0	4	0
20140318	2	1	4	2	3	2	0	0	0	0	4	2
20140527	2	1	4	2	3	2	0	0	0	0	4	0
20140529	1	1	2	2	3	2	1	1	0	0	4	0
20140904	2	1	3	2	4	2	0	1	0	0	4	2
20140526	2	1	2	2	2	2	0	0	0	0	4	0
20140321	2	1	2	2	2	2	0	0	0	0	3	2
20140327	2	1	3	2	3	2	1	1	1	0	3	0
20140528	1	1	1	2	2	1	0	0	0	0	3	0
20141103	2	1	2	2	3	2	0	1	0	0	3	0
20140722	2	1	4	2	3	1	0	0	0	0	2	2
20140725	2	1	4	2	2	1	1	0	0	0	2	0
20140523	1	1	3	2	3	1	0	0	0	0	2	0
20140528	2	1	3	2	3	2	0	0	1	0	6	2
20140604	2	1	3	2	1	3	1	1	0	1	6	2
20140321	2	1	3	2	1	3	1	1	1	1	6	0
20140320	2	1	1	2	3	2	0	1	1	1	6	2
20140929	1	1	4	2	1	2	1	0	0	1	6	2
20140930	2	1	2	2	2	2	0	1	1	0	6	0
20140217	1	1	1	2	2	2	0	1	0	1	6	2
20140605	2	1	2	2	1	2	1	0	0	0	6	2
20140321	1	1	3	2	1	2	1	0	0	0	6	2
20140326	1	1	2	2	4	2	1	0	0	0	6	2
20140217	2	1	3	2	1	2	1	1	0	0	6	2
20140604	2	1	2	2	3	2	0	1	1	0	6	2
20140604	1	1	4	2	2	2	0	0	1	0	6	2
20140320	1	1	3	2	2	2	1	0	0	0	6	0
20140605	1	1	1	2	1	2	1	0	1	1	6	0
20140605	1	1	3	2	2	2	1	1	0	1	6	0
20140929	1	1	1	2	3	2	0	0	0	0	6	0
20140804	1	1	4	2	2	2	1	0	0	0	6	0
20140527	1	1	2	2	2	2	0	0	1	1	6	0
20140605	1	1	1	2	3	2	1	1	0	0	6	0
20140929	1	1	1	2	2	2	1	1	0	0	5	2
20140219	2	1	2	2	3	2	0	1	0	0	5	2
20140219	2	1	2	2	2	2	1	0	1	0	5	0
20141210	2	1	3	2	3	2	0	0	0	0	5	2
20140606	1	1	4	2	4	2	0	0	1	0	5	2
20141112	2	1	1	2	1	1	0	0	1	0	5	2
20140928	2	1	1	2	4	2	0	0	1	0	5	0
20140606	2	1	3	2	3	2	0	1	1	0	5	2
20140409	2	1	3	2	2	2	0	0	0	0	5	2
20140928	1	1	1	2	4	2	0	0	0	0	5	0
20140217	1	1	4	2	2	2	1	0	0	1	5	2
20140319	2	1	1	2	3	2	0	1	1	0	5	2
20140930	1	1	4	2	2	2	1	0	1	0	5	0
20140805	1	1	4	2	3	2	0	0	0	0	5	0
20140218	1	1	4	2	2	2	0	0	1	0	5	2
20140630	1	1	1	2	2	3	0	0	0	0	5	0
20140528	1	1	1	2	2	2	0	1	1	0	5	0
20141121	1	1	3	2	3	2	1	0	1	0	5	2
20140603	2	1	1	2	2	2	1	0	0	0	5	0
20140829	1	1	3	2	2	2	0	1	1	0	5	2
20140805	2	1	3	2	2	2	0	0	0	1	5	0
20140217	2	1	3	2	2	2	1	1	1	0	5	2
20141121	1	1	3	2	2	2	1	0	0	1	5	2
20141031	1	1	1	2	1	2	1	0	1	0	5	0
20140526	2	1	1	2	1	2	1	1	0	0	5	2
20140321	1	1	3	2	2	2	0	0	0	0	5	0
20140606	2	1	1	2	1	2	1	1	1	0	5	2
20140526	1	1	1	2	2	2	1	0	1	1	5	2
20140605	2	1	3	2	2	2	1	0	1	1	5	2
20140429	2	1	1	2	1	3	1	0	0	0	5	2
20140320	2	1	4	2	2	2	1	0	0	0	5	0
20140928	1	1	2	2	4	2	1	0	0	0	5	2
20140321	2	1	1	2	2	2	0	1	0	1	5	0
20140526	1	1	4	2	2	2	1	0	0	0	5	0
20140219	2	1	1	2	2	2	1	1	0	1	5	2
20140604	1	1	3	2	2	2	1	1	1	0	5	0
20140929	2	1	4	2	2	1	1	0	1	1	5	2
20140321	2	1	3	2	3	3	0	0	0	0	5	0
20140218	1	1	1	2	2	2	0	0	1	1	5	0
20140605	2	1	1	2	2	2	1	1	0	0	5	2
20141030	2	1	2	2	2	2	0	0	1	1	5	2
20140211	2	1	3	2	2	2	0	1	1	0	5	2
20140526	1	1	4	2	3	2	1	1	0	0	5	2
20140715	1	1	4	2	3	2	1	0	1	0	5	2
20140604	2	1	1	2	2	2	1	1	1	0	4	2
20140930	1	1	1	2	2	2	0	0	0	1	4	0
20141014	1	1	1	2	1	1	0	0	0	0	4	2
20140603	1	1	2	2	2	2	1	1	0	0	4	0
20140606	1	1	1	2	2	2	0	0	1	0	4	2
20140320	2	1	3	2	2	2	0	1	0	0	4	2
20140603	1	1	3	2	3	2	0	0	1	0	4	2
20140604	1	1	1	2	3	2	1	0	0	0	4	2
20140604	2	1	2	2	2	2	0	1	0	0	4	2
20140630	2	1	1	2	3	2	0	1	1	0	4	0
20140929	2	1	4	2	3	2	0	1	0	0	4	2
20140526	2	1	1	2	1	2	0	1	1	0	4	2
20140526	1	1	2	2	3	2	1	0	1	0	4	0
20140526	1	1	1	2	3	2	1	0	0	0	4	0
20140603	2	1	3	2	3	2	1	1	1	0	4	0
20140328	2	1	3	2	2	2	1	0	0	0	4	2
20140606	2	1	1	2	2	2	0	1	1	1	4	0
20140319	1	1	1	2	3	2	1	0	1	0	4	2
20141121	1	1	1	2	2	2	1	0	0	0	4	2
20140324	2	1	3	2	2	2	1	0	0	0	4	0
20140526	2	1	1	2	2	2	0	0	0	0	4	0
20140321	1	1	3	2	3	3	0	0	1	0	4	0
20140818	2	1	1	2	3	2	0	0	0	0	4	2
20140929	2	1	2	2	2	2	1	1	0	0	4	2
20140325	1	1	2	2	3	2	1	0	0	0	4	2
20140605	1	1	4	2	2	2	1	0	1	0	4	0
20140526	1	1	1	2	2	2	0	0	1	0	4	0
20141031	2	1	1	2	2	2	1	0	1	1	4	2
20140604	2	1	2	2	2	2	1	0	0	0	4	0
20140319	2	1	4	2	3	2	0	1	0	0	4	2
20140409	1	1	1	2	3	2	1	0	0	1	4	0
20140606	1	1	1	2	3	2	0	0	0	0	4	0
20140930	2	1	4	2	4	3	0	1	1	0	4	2
20140916	2	1	1	2	2	2	0	0	0	1	4	2
20140219	2	1	2	2	3	2	1	1	1	0	4	2
20140730	2	1	2	2	3	2	0	0	0	0	4	2
20140411	2	1	4	2	3	2	0	0	1	0	4	2
20140605	1	1	3	2	2	2	1	0	0	0	4	0
20140528	2	1	1	2	2	3	0	1	1	0	4	0
20140806	1	1	2	2	3	2	1	0	0	0	4	2
20141112	2	1	2	2	2	2	1	0	0	0	4	2
20140527	2	1	2	2	3	2	1	1	0	1	4	2
20141009	2	1	2	2	3	2	1	1	1	0	4	2
20140928	1	1	1	2	2	2	1	0	1	0	4	0
20140319	2	1	1	2	4	2	0	0	0	0	4	2
20140605	1	1	1	2	3	1	1	1	1	0	4	2
20140915	2	1	4	2	3	2	0	0	0	0	4	0
20140930	2	1	1	2	3	2	1	1	0	0	4	0
20140605	2	1	3	2	3	2	0	0	0	1	4	2
20140718	2	1	4	2	3	2	1	1	0	1	4	2
20140723	2	1	2	2	1	2	0	0	0	1	4	0
20140527	2	1	3	2	3	2	0	1	1	0	4	0
20141014	2	1	3	2	3	2	1	1	0	0	4	2
20141014	2	1	2	2	2	2	1	0	0	1	3	2
20140218	2	1	1	2	3	2	1	0	1	0	3	0
20140606	1	1	1	2	2	2	0	0	1	0	3	2
20140219	1	1	4	2	3	1	0	1	1	0	3	2
20140928	1	1	1	2	2	2	0	0	0	1	3	0
20140327	1	1	1	2	2	1	0	0	0	0	3	2
20140606	1	1	4	2	2	2	0	0	0	0	3	0
20140219	1	1	3	2	4	1	1	1	1	0	3	2
20140929	2	1	1	2	2	2	1	1	1	0	3	0
20140321	2	1	2	2	2	1	0	1	0	0	2	2
20140219	1	1	4	2	4	1	0	0	1	1	2	0
20140930	1	1	3	2	4	1	0	0	0	0	2	0
20140630	1	1	3	2	4	2	1	0	1	0	2	2
20140528	1	1	4	2	4	2	0	0	0	0	2	0
20140319	2	1	3	2	4	1	0	1	0	0	2	0
20140219	2	1	4	2	3	1	1	0	0	1	1	2
20140818	2	1	2	2	4	1	0	1	1	0	1	0
20140930	2	1	4	2	3	1	0	0	1	0	1	0
20140219	1	1	1	2	3	1	1	0	0	0	1	0
20141030	2	1	1	2	2	3	1	1	1	1	6	2
20140331	1	1	3	2	3	2	0	0	0	0	6	0
20140528	2	1	4	2	3	2	1	0	1	0	6	2
20140718	2	1	1	2	2	2	0	1	1	0	6	2
20140717	1	1	3	2	2	2	1	0	1	0	6	2
20140331	1	1	4	2	2	2	1	1	0	1	6	2
20140522	1	1	1	2	2	2	1	1	1	1	6	2
20141119	1	1	4	2	3	2	1	1	0	0	6	0
20141014	1	1	1	2	2	1	1	0	0	0	6	2
20140522	1	1	2	2	2	3	1	1	0	0	6	0
20141030	1	1	1	2	3	2	1	1	0	0	6	2
20141030	1	1	1	2	1	2	0	1	0	0	6	2
20140811	1	1	2	2	2	3	0	0	1	0	6	0
20140612	1	1	1	2	2	2	0	0	1	0	6	0
20140331	1	1	2	2	3	3	1	0	0	0	6	2
20141030	2	1	2	2	2	2	1	1	0	0	6	0
20140402	1	1	4	2	3	2	1	0	0	0	6	0
20141011	1	1	3	2	4	2	0	0	0	0	6	0
20141114	1	1	4	2	3	2	0	0	0	0	6	2
20141030	2	1	1	2	3	2	1	1	0	0	6	2
20141030	2	1	1	2	1	2	0	1	1	0	6	0
20140106	2	1	1	2	3	2	1	1	0	0	6	0
20141030	2	1	1	2	2	3	0	1	0	0	6	2
20141024	1	1	3	2	2	2	0	1	0	0	6	0
20141119	2	1	1	2	4	2	1	1	1	0	6	2
20141014	1	1	4	2	1	2	1	0	0	0	6	2
20141020	2	1	3	2	3	2	1	1	0	0	6	0
20140411	1	1	1	2	3	2	0	0	0	0	6	2
20140331	2	1	4	2	2	2	1	1	0	0	6	2
20140711	2	1	2	2	3	2	1	1	0	0	6	0
20140331	1	1	4	2	2	1	0	1	0	0	6	0
20140402	2	1	4	2	4	2	0	0	1	0	6	2
20140429	1	1	1	2	1	2	1	0	0	1	5	2
20140801	2	1	2	2	3	2	0	0	1	0	5	2
20140606	2	1	4	2	2	2	1	0	1	1	5	2
20140808	1	1	1	2	1	2	0	0	0	1	5	0
20140331	2	1	1	2	2	2	1	0	1	0	5	2
20141031	1	1	1	2	4	2	0	0	1	0	5	0
20140717	1	1	1	2	4	2	1	1	0	1	5	2
20140616	2	1	1	2	2	2	0	0	1	0	5	0
20141215	1	1	2	2	2	2	1	1	1	1	5	0
20140321	1	1	4	2	4	2	0	0	0	0	5	0
20141009	2	1	2	2	2	2	1	0	1	0	5	0
20140807	2	1	4	2	3	2	0	0	0	0	5	2
20140808	2	1	1	2	2	2	0	1	0	0	5	2
20140523	1	1	1	2	4	3	1	1	1	0	5	2
20141031	2	1	1	2	2	2	1	0	0	0	5	2
20140219	2	1	3	2	3	2	1	1	1	1	5	2
20141118	1	1	3	2	2	2	1	0	1	0	5	2
20140620	1	1	3	2	2	2	1	0	1	0	5	2
20140717	2	1	3	2	3	3	1	1	0	0	5	2
20140522	2	1	1	2	1	2	0	1	0	1	5	2
20140722	2	1	4	2	2	2	0	0	1	0	5	2
20141031	1	1	2	2	2	2	0	0	1	0	5	2
20141215	2	1	3	2	2	2	1	1	1	0	5	2
20141030	2	1	1	2	2	2	1	1	1	0	5	2
20141030	1	1	1	2	2	2	1	0	1	0	5	2
20140522	1	1	3	2	2	2	0	1	0	0	5	0
20141030	1	1	1	2	2	2	1	0	1	0	5	2
20140523	2	1	1	2	2	2	0	0	0	0	5	2
20140721	2	1	1	2	2	2	0	0	1	0	5	0
20140718	1	1	3	2	2	2	0	0	0	0	5	0
20140411	1	1	1	2	2	2	0	0	0	0	5	0
20141010	2	1	3	2	4	2	0	1	1	0	5	2
20140522	1	1	1	2	4	1	0	1	1	0	5	2
20141030	1	1	1	2	2	2	1	1	1	1	5	2
20141103	1	1	2	2	2	2	1	1	0	0	5	2
20141112	1	1	4	2	2	2	1	1	1	0	5	0
20140630	1	1	2	2	2	2	0	1	0	0	5	2
20141114	1	1	2	2	4	2	1	0	0	0	5	2
20140327	2	1	2	2	2	2	0	1	1	0	5	2
20140718	2	1	1	2	3	2	0	1	1	0	5	0
20140605	2	1	1	2	2	2	1	1	1	0	5	2
20141104	1	1	3	2	2	3	0	0	0	0	5	0
20140606	1	1	1	2	3	3	1	0	0	0	5	0
20140110	1	1	1	2	2	2	1	0	1	0	5	0
20140106	2	1	1	2	2	2	0	1	0	1	5	2
20141119	1	1	1	2	2	2	0	0	0	0	5	0
20140331	1	1	2	2	2	2	0	0	1	0	5	0
20140910	1	1	1	2	2	2	1	1	0	0	5	0
20140326	2	1	2	2	3	2	1	0	1	0	5	0
20140124	2	1	1	2	2	2	0	1	0	1	4	2
20140916	2	1	1	2	1	2	1	0	1	0	4	2
20141030	1	1	1	2	3	2	0	0	0	0	4	0
20140528	2	1	4	2	3	2	0	0	0	0	4	2
20140319	1	1	4	2	3	2	0	0	0	0	4	2
20140411	1	1	3	2	3	2	0	0	1	0	4	0
20140928	1	1	2	2	2	3	0	0	1	0	4	2
20140922	2	1	4	2	3	2	0	0	1	0	4	2
20140318	1	1	4	2	3	2	0	1	0	0	4	0
20140528	1	1	4	2	2	2	1	1	1	0	4	0
20140528	2	1	2	2	3	2	0	1	0	0	4	2
20140523	2	1	3	2	2	2	0	0	0	0	4	2
20141215	2	1	3	2	3	3	0	1	0	0	4	2
20140411	2	1	1	2	2	2	0	0	0	0	4	2
20141030	2	1	1	2	2	2	0	0	0	1	4	2
20140704	2	1	1	2	2	3	0	1	0	0	4	2
20140718	2	1	1	2	2	2	0	1	1	0	4	2
20140606	1	1	3	2	4	2	0	0	0	0	4	0
20140331	2	1	1	2	3	2	0	1	1	0	4	0
20140606	1	1	3	2	3	2	1	1	0	0	4	0
20140930	1	1	3	2	2	3	0	0	1	0	4	0
20140916	1	1	1	2	3	2	0	0	0	0	4	2
20140808	2	1	2	2	3	2	0	0	1	0	4	2
20140519	2	1	4	2	3	2	0	1	0	0	4	2
20140718	1	1	2	2	3	2	1	1	1	0	4	2
20141119	2	1	1	2	1	2	1	1	1	0	4	2
20140619	1	1	2	2	2	2	0	0	1	0	4	2
20140331	2	1	1	2	1	2	0	1	0	0	4	2
20140218	2	1	1	2	3	2	0	1	1	1	4	2
20141030	2	1	1	2	2	2	1	1	1	0	4	2
20140522	2	1	4	2	4	2	1	0	0	0	4	2
20141030	2	1	1	2	1	2	1	1	1	0	4	0
20140522	2	1	1	2	3	2	0	1	1	0	4	2
20140404	1	1	1	2	2	2	1	0	1	0	4	0
20140522	2	1	3	2	3	2	1	1	0	0	4	2
20140523	1	1	4	2	2	2	0	0	1	0	4	0
20140523	1	1	3	2	2	2	0	0	1	0	4	2
20140612	2	1	2	2	3	2	0	0	1	0	4	0
20140321	1	1	2	2	2	2	0	0	1	1	4	2
20141119	2	1	4	2	3	2	0	1	0	0	3	2
20140523	2	1	2	2	2	2	1	0	0	0	3	0
20140418	2	1	1	2	2	2	1	1	0	0	3	0
20140408	1	1	1	2	4	2	1	0	0	0	3	2
20140718	2	1	1	2	4	2	0	1	0	0	3	0
20140808	2	1	1	2	4	2	0	0	0	0	3	2
20140718	2	1	4	2	3	1	0	0	0	0	3	2
20140109	2	1	1	2	3	1	1	0	1	0	3	2
20140403	1	1	1	2	2	1	0	0	0	0	2	2
20140114	1	1	4	2	3	1	0	0	0	0	2	2
20140326	2	1	1	2	4	1	0	0	0	0	1	0
20140331	1	1	4	2	4	1	0	0	0	0	1	0
20140801	2	1	1	2	2	1	1	0	0	0	1	2
20140218	2	1	2	2	1	3	0	1	0	0	6	2
20140804	2	1	3	2	1	2	1	0	0	1	6	0
20141103	1	1	2	2	2	2	1	0	0	1	6	0
20141103	1	1	1	2	1	2	1	0	1	0	6	2
20140620	1	1	1	2	1	2	1	0	1	0	6	2
20140617	2	1	3	2	2	2	0	0	0	0	6	2
20141121	2	1	3	2	2	3	1	1	0	1	6	2
20140409	1	1	4	2	2	2	0	0	0	1	6	0
20140620	1	1	3	2	4	2	0	0	0	0	5	2
20140702	2	1	3	2	4	2	1	1	1	0	5	0
20140411	2	1	3	2	4	2	0	0	0	1	5	2
20140630	2	1	1	2	2	2	1	0	1	0	5	2
20141119	1	1	1	2	3	2	0	0	1	0	5	0
20140605	1	1	3	2	4	2	0	1	0	0	5	0
20140603	1	1	3	2	3	2	0	0	0	1	5	0
20140403	2	1	2	2	3	2	1	1	0	1	5	2
20140808	2	1	1	2	2	2	0	0	0	0	5	0
20140813	2	1	2	2	4	1	1	0	1	0	5	2
20140618	1	1	1	2	2	2	0	0	1	0	5	2
20140612	1	1	2	2	2	2	1	0	1	0	5	2
20141118	1	1	2	2	2	2	1	0	1	1	5	2
20140826	1	1	1	2	3	2	1	0	0	0	5	2
20140416	2	1	4	2	2	2	0	0	0	0	5	2
20140212	2	1	1	2	2	2	1	0	0	0	5	0
20140311	1	1	4	2	4	2	0	0	0	0	5	2
20140811	2	1	1	2	3	2	1	0	1	0	5	2
20140424	1	1	1	2	2	2	0	0	1	0	5	0
20140805	1	1	2	2	3	2	1	0	1	0	5	2
20141112	2	1	4	2	2	2	0	0	0	0	5	0
20140808	1	1	1	2	2	2	1	0	1	0	5	0
20140618	1	1	1	2	2	2	0	0	0	0	5	2
20141121	1	1	1	2	3	2	1	0	0	0	5	2
20140806	2	1	4	2	2	2	0	0	1	0	5	2
20141119	2	1	1	2	2	2	1	0	0	0	5	2
20140808	1	1	1	2	3	2	0	0	1	0	5	0
20140217	2	1	4	2	3	2	0	0	1	0	5	2
20140804	2	1	2	2	2	2	1	0	0	0	5	2
20140804	1	1	2	2	2	2	0	0	0	0	5	2
20140618	1	1	1	2	2	3	1	0	1	0	5	0
20140417	2	1	2	2	2	2	1	1	1	1	5	2
20141031	1	1	4	2	2	2	0	0	1	0	5	2
20141118	2	1	3	2	2	2	0	0	1	0	5	2
20141029	1	1	4	2	4	2	0	1	0	0	5	2
20140812	2	1	3	2	2	2	0	0	0	0	5	2
20141014	2	1	1	2	3	3	0	0	0	0	5	2
20140808	1	1	1	2	2	2	1	0	0	0	5	0
20141029	2	1	4	2	2	2	1	0	0	1	5	2
20140807	1	1	1	2	2	3	1	0	0	1	5	2
20140411	1	1	3	2	2	2	1	0	0	0	5	2
20140618	2	1	2	2	2	3	0	0	0	0	5	0
20140630	2	1	3	2	3	2	0	0	1	0	5	2
20140409	1	1	2	2	3	2	0	0	0	0	5	0
20140411	1	1	3	2	2	2	1	0	0	0	5	0
20141103	1	1	3	2	2	2	1	0	0	0	5	2
20140618	2	1	3	2	2	2	1	0	1	1	5	2
20140808	1	1	1	2	2	2	1	0	1	1	5	2
20140619	1	1	3	2	2	1	0	0	1	0	5	2
20140423	1	1	1	2	2	2	1	0	1	0	5	2
20140409	1	1	2	2	2	2	1	0	1	0	5	0
20140424	2	1	1	2	2	2	1	0	1	0	5	2
20140409	1	1	4	2	3	3	0	0	1	0	5	0
20140616	2	1	3	2	2	2	0	0	1	0	5	2
20141030	2	1	3	2	2	2	0	0	1	0	5	2
20140408	2	1	4	2	2	2	0	0	0	0	5	2
20140808	1	1	2	2	2	2	0	0	0	0	5	0
20140217	2	1	1	2	2	2	1	1	1	1	5	2
20140618	2	1	1	2	2	2	0	0	1	0	5	2
20140604	1	1	1	2	2	2	0	0	1	1	5	2
20140618	2	1	1	2	2	2	0	0	0	0	5	2
20140606	1	1	3	2	2	2	1	0	1	0	5	0
20140620	1	1	2	2	2	2	0	0	0	0	5	2
20140730	1	1	1	2	2	2	1	0	1	0	5	2
20140616	1	1	2	2	2	2	0	0	1	1	5	0
20140424	2	1	2	2	3	2	1	0	0	0	5	2
20141119	2	1	4	2	3	2	0	0	1	0	5	2
20140618	1	1	1	2	1	3	0	0	0	0	5	0
20141031	2	1	1	2	1	2	1	0	1	0	5	2
20140408	1	1	4	2	3	2	1	0	0	0	5	2
20140618	1	1	3	2	2	2	1	0	0	1	5	0
20140807	1	1	1	2	3	2	0	0	0	0	5	2
20140410	1	1	1	2	2	2	0	0	0	0	5	2
20140804	1	1	2	2	2	2	0	0	0	1	5	2
20140808	1	1	3	2	2	2	0	1	0	0	4	0
20140424	2	1	1	2	2	2	1	0	0	0	4	2
20140616	2	1	1	2	3	2	1	0	1	0	4	0
20140428	2	1	3	2	3	2	0	0	0	0	4	2
20140618	2	1	1	2	2	2	1	0	0	0	4	2
20140929	2	1	1	2	3	2	0	1	0	0	4	0
20140808	2	1	1	2	2	2	1	0	1	1	4	2
20140619	1	1	4	2	3	2	0	0	0	0	4	0
20141029	2	1	2	2	2	2	1	0	1	1	4	2
20141103	2	1	1	2	2	2	1	0	1	0	4	2
20140612	1	1	4	2	3	3	1	0	1	0	4	2
20141030	2	1	1	2	2	2	1	1	0	1	4	2
20140617	2	1	3	2	4	2	0	0	0	0	4	0
20140616	1	1	1	2	2	2	1	1	0	0	4	0
20141103	1	1	1	2	2	2	0	0	0	0	4	0
20141215	2	1	3	2	2	2	0	0	1	0	4	2
20140806	2	1	1	2	3	2	0	0	1	0	4	2
20140321	2	1	2	2	2	2	0	0	0	0	4	2
20141014	1	1	1	2	2	2	1	0	0	1	4	2
20140807	1	1	2	2	3	2	1	0	0	0	4	2
20140618	1	1	2	2	3	2	0	0	1	0	4	0
20140804	2	1	1	2	2	2	1	0	1	0	4	2
20140424	1	1	1	2	2	2	0	0	0	0	4	0
20140806	2	1	2	2	2	2	0	0	0	1	4	2
20140214	2	1	1	2	3	2	1	1	1	0	4	0
20140409	2	1	1	2	3	2	0	0	1	0	4	2
20140618	2	1	1	2	1	2	0	0	1	0	4	2
20140806	1	1	2	2	3	2	1	0	0	0	4	0
20140711	2	1	4	2	2	2	0	1	0	0	4	2
20140704	1	1	2	2	2	2	1	0	0	0	4	0
20141029	2	1	1	2	3	2	0	0	0	0	4	2
20140910	2	1	1	2	2	2	0	0	1	0	4	2
20140619	1	1	2	2	3	2	0	0	0	0	4	0
20140804	1	1	2	2	2	2	1	0	0	0	4	2
20140617	2	1	1	2	3	2	0	0	0	0	4	2
20140409	2	1	2	2	3	2	0	0	0	0	4	0
20140319	2	1	1	2	3	2	1	1	0	0	4	2
20140110	1	1	2	2	3	2	0	1	1	0	4	2
20140320	1	1	4	2	3	2	1	0	0	1	4	0
20141119	2	1	3	2	3	2	1	0	1	0	4	2
20140409	2	1	2	2	3	2	1	0	0	0	4	2
20140408	2	1	3	2	2	2	0	0	0	0	4	2
20141008	2	1	4	2	3	2	1	0	0	1	4	2
20140619	2	1	2	2	2	2	0	0	0	0	4	2
20141118	1	1	1	2	3	2	1	0	1	0	4	2
20140617	2	1	1	2	3	2	0	0	0	0	4	2
20140617	2	1	1	2	2	2	0	0	1	0	4	2
20140313	1	1	1	2	2	2	1	0	0	0	4	2
20140408	1	1	4	2	3	3	0	0	0	0	4	0
20141031	2	1	3	2	3	2	0	0	0	1	4	2
20140928	2	1	1	2	2	2	1	1	0	0	4	0
20140617	1	1	2	2	2	3	0	0	1	0	4	2
20140606	2	1	3	2	3	2	0	0	1	0	4	2
20140929	1	1	4	2	2	1	1	1	1	1	4	0
20140616	2	1	3	2	3	2	1	1	0	0	4	2
20140811	1	1	2	2	3	2	0	0	1	0	4	0
20140401	2	1	2	2	2	2	1	0	0	0	4	0
20140616	1	1	4	2	3	2	1	0	0	0	4	2
20140617	2	1	2	2	3	2	0	0	1	0	4	0
20141118	1	1	1	2	2	2	1	0	1	0	4	2
20140617	2	1	3	2	3	2	0	0	0	0	4	2
20141119	2	1	4	2	4	2	1	1	1	0	4	0
20141030	2	1	4	2	3	2	1	1	0	0	4	2
20141009	1	1	4	2	3	2	1	1	1	0	4	0
20140805	2	1	4	2	3	2	0	0	0	0	4	2
20140619	1	1	3	2	2	1	0	0	1	0	4	2
20140317	2	1	4	2	4	2	0	0	1	0	4	2
20140528	2	1	2	2	2	2	0	0	0	0	4	0
20140806	2	1	2	2	2	2	0	0	0	0	4	2
20140730	1	1	4	2	3	2	1	0	0	0	4	2
20141030	2	1	4	2	3	2	0	0	1	0	4	2
20141118	1	1	3	2	2	2	1	0	1	1	4	0
20140616	2	1	3	2	2	2	0	0	1	0	4	0
20140806	2	1	4	2	2	3	0	0	1	0	4	2
20140806	2	1	2	2	2	2	0	0	0	0	4	2
20140808	2	1	4	2	3	3	1	0	0	0	4	2
20140616	2	1	2	2	2	2	0	0	1	0	4	0
20141119	1	1	1	2	3	2	1	0	1	0	3	2
20140408	1	1	4	2	3	2	1	0	1	0	3	0
20140620	2	1	2	2	2	2	1	0	0	0	3	2
20140808	1	1	4	2	2	2	0	0	1	0	3	2
20140408	2	1	1	2	3	2	0	0	1	0	3	2
20141030	2	1	3	2	3	2	0	0	0	0	3	0
20141031	2	1	2	2	3	2	0	0	1	0	3	2
20140917	1	1	1	2	1	2	0	0	0	0	3	0
20140618	1	1	4	2	3	2	0	0	0	0	3	2
20141031	1	1	2	2	2	2	1	0	0	0	2	2
20140528	2	1	4	2	4	1	1	1	0	0	2	2
20141030	1	1	1	2	4	2	0	1	1	0	2	0
20140627	2	1	1	2	3	1	0	0	0	0	2	0
20140410	2	1	2	2	3	1	0	0	0	0	1	0
20140620	1	1	4	2	4	2	0	0	0	0	1	0
20140408	2	1	2	2	2	1	0	0	0	0	1	0
20140801	2	1	4	2	1	3	0	0	0	1	6	0
20140730	1	1	4	2	2	2	1	0	1	1	6	2
20140402	1	1	2	2	2	2	1	0	1	0	6	0
20140404	1	1	1	2	1	2	1	0	1	0	6	2
20140613	2	1	1	2	1	2	1	0	0	1	6	2
20140611	1	1	3	2	1	2	0	0	0	0	6	0
20141008	2	1	2	2	1	2	1	0	0	0	6	2
20140929	1	1	4	2	2	2	0	0	1	0	6	0
20141010	2	1	2	2	1	2	0	0	1	0	6	2
20140801	1	1	4	2	2	2	0	0	0	0	6	0
20140929	1	1	1	2	2	3	1	0	1	0	6	0
20140526	2	1	3	2	1	3	0	0	0	0	6	0
20141119	2	1	3	2	2	3	0	1	1	0	6	2
20140429	1	1	2	2	2	3	0	0	1	0	6	0
20140723	1	1	2	2	4	2	0	0	1	0	6	2
20140402	1	1	4	2	4	2	1	0	1	1	6	2
20140612	2	1	4	2	3	2	0	0	1	0	6	2
20140402	1	1	1	2	1	2	0	0	1	0	6	2
20140610	2	1	2	2	2	2	1	0	1	0	6	2
20140217	1	1	1	2	4	2	0	0	0	0	6	2
20140610	1	1	2	2	2	2	1	0	0	1	6	2
20140610	1	1	2	2	1	2	0	0	0	0	6	2
20140311	2	1	2	2	2	2	0	1	0	0	5	2
20140805	2	1	3	2	3	2	0	0	1	0	5	2
20140811	2	1	1	2	3	2	1	0	0	0	5	2
20140613	1	1	3	2	3	2	0	0	0	0	5	2
20140417	2	1	2	2	3	3	0	0	0	0	5	2
20140613	1	1	3	2	2	2	0	0	1	0	5	0
20140728	1	1	1	2	4	2	1	0	0	0	5	2
20140415	2	1	3	2	2	2	1	0	0	1	5	2
20141030	1	1	4	2	4	2	1	0	1	1	5	2
20140928	1	1	3	2	4	2	1	0	1	0	5	2
20140402	2	1	1	2	2	2	1	0	1	1	5	2
20141010	2	1	4	2	1	2	0	0	1	0	5	2
20140610	2	1	4	2	2	2	1	0	0	1	5	2
20140325	1	1	2	2	3	2	1	0	0	0	5	2
20140612	2	1	4	2	2	2	1	0	0	0	5	2
20140611	1	1	2	2	2	2	0	0	1	0	5	2
20141009	2	1	2	2	3	2	0	0	1	0	5	2
20140402	2	1	3	2	3	2	0	0	1	0	5	2
20140619	2	1	2	2	1	2	0	0	0	0	5	0
20140930	2	1	1	2	3	2	1	0	1	0	5	2
20140929	1	1	1	2	2	2	0	0	1	0	5	0
20140613	1	1	2	2	2	2	0	0	1	1	5	2
20140612	2	1	4	2	2	3	1	0	0	0	5	0
20140613	1	1	4	2	3	2	0	0	0	1	5	2
20140730	1	1	4	2	2	2	0	0	1	0	5	0
20140928	1	1	4	2	2	2	0	0	1	0	5	2
20140604	2	1	3	2	3	2	0	1	1	0	5	2
20140929	1	1	2	2	2	3	0	0	0	0	5	0
20141008	1	1	2	2	2	2	0	0	0	0	5	0
20140613	2	1	2	2	1	2	0	0	0	0	5	2
20140401	1	1	3	2	3	2	1	0	0	1	5	2
20140418	2	1	2	2	2	1	0	0	1	0	5	0
20141009	2	1	4	2	4	2	0	0	1	0	5	2
20140610	1	1	1	2	2	2	1	0	0	0	5	2
20141010	1	1	2	2	1	2	0	0	1	0	5	2
20140401	1	1	1	2	2	2	0	0	0	0	5	0
20140401	2	1	4	2	3	2	0	0	0	0	5	2
20140402	1	1	4	2	2	2	0	0	1	0	5	0
20140711	1	1	4	2	2	2	0	0	1	0	5	0
20140928	2	1	4	2	2	2	0	0	1	1	5	2
20140929	1	1	1	2	2	2	1	0	0	1	5	0
20141010	2	1	1	2	2	2	1	0	0	0	5	0
20140613	1	1	1	2	2	2	1	0	0	0	5	2
20140403	2	1	2	2	2	3	1	0	0	0	5	2
20140402	1	1	2	2	2	1	0	0	0	0	5	0
20140611	1	1	1	2	2	2	1	0	1	1	5	2
20140929	1	1	2	2	2	2	0	0	0	0	5	0
20141204	1	1	4	2	2	2	1	0	0	0	5	0
20140417	1	1	1	2	2	2	1	0	1	1	5	2
20141009	1	1	1	2	2	2	1	0	1	0	5	2
20140801	1	1	3	2	2	2	0	0	0	0	5	0
20140812	2	1	1	2	1	2	1	0	1	0	5	0
20140402	2	1	1	2	2	3	0	0	0	1	5	2
20140930	2	1	3	2	2	2	0	0	1	0	5	0
20140812	2	1	1	2	2	2	0	1	1	0	5	2
20140402	1	1	1	2	2	2	1	0	0	0	5	0
20141010	1	1	2	2	4	2	1	1	1	0	5	2
20140611	2	1	4	2	2	3	0	0	0	0	5	0
20140812	1	1	1	2	2	2	0	0	1	0	5	2
20140728	1	1	3	2	2	2	0	0	1	0	5	0
20140221	1	1	3	2	2	2	0	0	0	0	5	2
20140730	1	1	1	2	2	2	0	0	0	0	5	2
20140611	2	1	2	2	3	2	0	0	0	0	5	2
20140814	2	1	1	2	2	2	0	0	0	0	5	2
20140728	1	1	2	2	2	3	0	0	1	1	5	2
20140626	1	1	2	2	3	2	0	0	0	0	5	0
20141009	1	1	1	2	2	2	0	0	0	0	5	2
20140402	1	1	1	2	2	2	1	0	0	0	5	2
20141009	1	1	3	2	2	2	0	0	1	1	4	2
20140730	1	1	1	2	2	3	0	0	1	0	4	0
20140401	2	1	1	2	2	2	0	0	0	0	4	2
20140415	1	1	3	2	2	2	0	0	0	1	4	2
20140604	1	1	1	2	3	2	1	1	1	0	4	2
20140709	2	1	3	2	3	2	0	1	1	1	4	2
20141203	2	1	3	2	2	2	0	1	0	0	4	2
20140401	1	1	1	2	2	2	1	0	0	0	4	0
20141121	1	1	1	2	1	3	1	1	0	1	4	2
20141011	2	1	1	2	3	2	0	0	1	1	4	2
20140612	2	1	2	2	2	3	1	0	0	0	4	0
20141009	1	1	2	2	3	2	1	0	0	0	4	2
20140403	1	1	1	2	2	2	0	0	1	0	4	2
20140926	1	1	1	2	3	1	1	0	0	0	4	2
20140928	2	1	4	2	2	2	0	0	1	0	4	2
20140728	2	1	1	2	2	2	1	0	1	0	4	2
20140403	2	1	4	2	2	2	0	0	1	0	4	2
20140813	2	1	4	2	2	2	0	0	1	0	4	0
20140116	2	1	4	2	2	2	0	1	0	1	4	0
20140729	2	1	1	2	2	2	1	0	0	0	4	2
20140929	2	1	1	2	2	2	0	0	0	0	4	2
20140929	1	1	1	2	3	2	0	0	0	0	4	0
20140812	1	1	1	2	2	2	0	0	1	0	4	2
20140611	2	1	1	2	3	2	0	0	1	0	4	0
20140613	2	1	4	2	3	2	0	1	1	1	4	2
20140929	2	1	1	2	2	2	1	0	0	0	4	2
20140403	1	1	4	2	3	1	1	0	1	0	4	2
20140401	2	1	1	2	2	2	1	0	0	0	4	0
20140611	1	1	3	2	2	2	0	0	0	0	4	2
20140928	1	1	2	2	2	2	1	0	1	0	4	2
20140401	1	1	3	2	2	2	0	0	1	0	4	2
20140416	1	1	1	2	1	1	1	0	0	0	4	0
20140731	1	1	4	2	2	2	0	0	0	0	4	0
20141011	2	1	1	2	2	2	1	0	0	0	4	2
20140414	2	1	4	2	2	2	0	0	0	0	4	2
20140416	1	1	1	2	3	2	0	1	1	0	4	0
20140813	1	1	4	2	1	1	1	0	1	0	4	2
20140401	2	1	4	2	3	2	1	0	0	0	4	0
20141009	2	1	2	2	2	2	0	0	0	1	4	0
20140813	1	1	3	2	3	3	1	0	0	0	4	0
20140814	2	1	4	2	3	2	0	1	0	0	4	2
20140611	2	1	1	2	2	2	1	0	1	0	4	2
20140610	2	1	3	2	2	2	0	0	0	1	4	2
20140522	2	1	1	2	3	2	0	1	0	0	4	0
20140401	1	1	3	2	2	3	1	0	0	1	4	2
20141011	1	1	4	2	2	2	0	0	1	1	4	2
20140815	1	1	1	2	2	2	0	0	1	0	4	2
20140417	1	1	1	2	3	2	0	0	1	0	4	2
20140612	1	1	2	2	2	2	0	0	0	0	4	2
20140904	1	1	2	2	3	1	0	0	0	0	4	0
20140115	2	1	4	2	3	2	1	0	0	0	4	0
20141009	2	1	3	2	3	3	0	0	1	0	4	2
20140728	1	1	1	2	4	2	0	1	0	0	4	2
20140624	1	1	3	2	2	2	0	0	1	0	4	0
20140403	2	1	1	2	3	2	1	0	0	0	4	2
20141010	1	1	2	2	2	3	0	0	0	0	4	0
20140417	2	1	1	2	2	2	0	0	1	0	4	2
20141021	2	1	2	2	3	2	0	1	0	1	4	0
20140414	1	1	2	2	3	2	1	0	0	0	4	2
20140729	2	1	1	2	3	2	0	0	0	0	4	2
20140922	1	1	4	2	3	3	0	0	1	0	4	2
20140414	1	1	4	2	2	2	0	0	1	1	4	0
20140414	2	1	2	2	2	2	1	0	1	0	4	0
20140620	2	1	4	2	3	2	0	0	1	0	4	2
20140519	2	1	2	2	3	2	0	1	0	0	4	0
20140611	1	1	1	2	2	1	1	0	0	0	4	2
20140610	2	1	1	2	3	2	0	0	0	0	4	0
20140813	2	1	1	2	2	2	0	0	0	0	4	2
20141030	2	1	4	2	3	2	0	0	1	0	4	0
20140815	2	1	2	2	3	2	0	0	0	0	4	2
20140402	2	1	1	2	2	2	1	0	0	0	4	2
20140402	1	1	2	2	2	1	1	0	0	0	4	2
20140731	2	1	4	2	3	2	0	1	1	1	4	2
20141009	2	1	4	2	3	2	0	0	1	0	4	0
20141021	2	1	4	2	3	3	0	0	1	0	4	2
20140929	1	1	3	2	3	2	0	0	1	0	4	0
20141011	2	1	1	2	2	2	0	0	0	0	4	2
20140930	2	1	1	2	3	2	1	0	0	0	4	2
20140414	1	1	2	2	3	2	1	0	1	0	4	0
20140812	1	1	2	2	2	1	0	0	0	0	4	0
20140414	2	1	1	2	3	2	0	0	1	0	4	2
20140401	2	1	4	2	3	3	1	0	0	0	4	2
20140402	1	1	2	2	3	2	1	0	0	0	4	2
20140730	2	1	2	2	3	2	0	0	1	0	4	2
20140619	1	1	1	2	3	2	0	0	1	0	4	0
20140110	1	1	1	2	2	2	1	0	0	1	3	2
20141009	1	1	3	2	4	1	0	0	0	0	3	2
20140926	2	1	1	2	1	2	0	1	0	0	3	2
20140612	2	1	1	2	3	2	0	0	0	0	3	2
20140903	2	1	1	2	2	2	0	1	1	0	3	0
20140728	2	1	1	2	3	2	0	0	1	0	3	2
20140813	2	1	1	2	2	2	0	0	1	1	3	2
20140730	2	1	1	2	1	1	0	0	1	0	3	2
20140728	1	1	1	2	4	2	0	0	0	0	2	2
20140331	2	1	2	2	4	2	1	0	0	0	2	2
20140331	2	1	2	2	2	1	0	0	1	0	2	2
20140603	1	1	2	2	3	1	0	0	0	0	2	0
20140730	1	1	1	2	1	1	0	0	0	0	2	2
20140610	2	1	4	2	3	1	1	0	0	0	2	0
20140403	1	1	2	2	1	1	1	0	0	0	2	0
20140611	2	1	2	2	2	1	0	0	0	0	1	0
20140912	2	1	4	2	1	2	0	0	1	0	6	0
20140310	1	1	3	2	4	2	0	0	0	0	6	0
20140612	1	1	1	2	3	3	0	0	0	0	6	0
20140313	1	1	2	2	1	3	0	0	0	0	6	0
20140529	1	1	1	2	1	2	1	0	0	0	6	2
20140403	1	1	3	2	1	2	1	1	0	0	6	2
20140822	2	1	1	2	2	2	0	1	1	0	6	0
20140916	2	1	4	2	3	2	0	0	0	0	6	2
20140730	1	1	1	2	2	2	0	0	1	0	6	2
20140312	1	1	4	2	4	2	1	0	0	1	6	0
20141029	2	1	3	2	1	3	0	1	0	0	6	0
20141030	1	1	4	2	3	2	0	0	1	0	6	0
20140731	1	1	1	2	3	2	1	1	0	0	6	2
20140314	1	1	1	2	2	2	1	1	0	0	6	0
20140715	1	1	4	2	3	2	1	0	1	0	6	2
20141029	1	1	1	2	1	3	0	1	0	0	6	0
20140404	1	1	3	2	4	2	1	0	1	0	6	2
20141029	1	1	1	2	3	2	1	0	0	1	6	2
20140106	1	1	4	2	4	2	1	0	1	1	6	0
20140730	2	1	4	2	2	2	0	1	0	0	6	2
20140214	2	1	2	2	3	2	1	1	0	0	6	2
20141031	2	1	1	2	2	2	1	1	0	0	6	2
20140814	1	1	3	2	2	2	1	0	1	0	6	0
20141029	2	1	1	2	3	2	1	1	0	0	6	2
20140825	2	1	1	2	3	2	1	1	1	0	6	2
20140529	2	1	1	2	1	2	1	1	0	1	6	2
20140318	1	1	4	2	4	2	0	0	1	0	6	2
20140903	2	1	1	2	1	2	0	1	0	1	6	0
20140211	1	1	1	2	3	2	1	0	1	0	6	0
20140529	1	1	1	2	1	2	1	0	0	0	6	0
20140403	2	1	1	2	3	3	0	0	0	1	6	2
20140910	1	1	4	2	3	2	1	0	1	0	6	2
20140313	2	1	4	2	4	2	0	1	1	1	6	2
20141029	1	1	1	2	3	2	1	0	0	0	6	0
20140903	2	1	2	2	4	2	1	0	0	0	6	0
20140715	2	1	1	2	1	2	0	1	0	0	6	2
20140825	1	1	3	2	2	2	1	1	0	0	6	0
20141029	2	1	2	2	2	2	0	1	0	0	6	0
20140311	2	1	4	2	1	2	1	1	0	1	6	2
20141028	2	1	4	2	4	2	0	1	0	0	6	2
20140924	1	1	1	2	1	2	0	1	0	0	6	2
20140730	1	1	3	2	2	2	0	1	1	0	6	2
20140701	2	1	1	2	3	2	0	1	1	0	5	2
20140807	1	1	4	2	4	2	1	0	0	0	5	2
20140915	2	1	1	2	2	2	0	0	1	0	5	2
20140310	1	1	1	2	3	2	1	0	0	1	5	2
20140822	2	1	1	2	3	2	0	1	1	0	5	2
20140928	1	1	2	2	3	2	0	0	1	0	5	2
20140530	2	1	1	2	2	2	1	1	0	0	5	0
20140714	2	1	3	2	2	2	1	0	1	1	5	2
20141121	2	1	4	2	4	2	0	1	1	0	5	0
20140311	2	1	4	2	2	2	0	1	1	0	5	2
20140314	2	1	3	2	2	2	1	0	1	0	5	2
20140106	2	1	3	2	2	2	0	0	1	0	5	2
20141027	1	1	3	2	2	2	1	1	0	0	5	0
20140822	1	1	3	2	2	2	0	0	1	0	5	0
20140826	1	1	1	2	2	3	1	0	1	0	5	0
20140616	1	1	1	2	2	2	1	0	0	0	5	2
20140910	1	1	3	2	2	2	0	0	0	0	5	0
20140417	1	1	2	2	2	2	1	0	0	0	5	2
20140814	1	1	1	2	2	2	0	0	0	0	5	2
20141121	1	1	1	2	4	2	1	0	1	1	5	0
20140530	1	1	1	2	3	2	1	1	0	1	5	2
20140728	1	1	4	2	4	2	0	1	1	0	5	2
20140903	1	1	2	2	2	2	1	0	0	0	5	0
20140826	2	1	1	2	1	2	0	1	0	0	5	0
20140311	2	1	2	2	2	2	1	1	0	1	5	2
20140731	2	1	3	2	4	2	0	1	1	0	5	0
20141029	1	1	1	2	2	2	1	0	1	0	5	2
20140730	2	1	2	2	2	2	0	1	1	0	5	2
20140627	1	1	1	2	1	2	1	0	0	0	5	2
20140625	2	1	2	2	2	2	0	0	0	0	5	2
20140218	2	1	1	2	2	2	1	1	0	0	5	2
20140530	1	1	3	2	2	2	1	0	1	0	5	2
20140722	2	1	3	2	2	2	1	1	0	1	5	2
20140910	1	1	1	2	2	1	0	1	0	0	5	0
20141029	2	1	1	2	1	2	0	0	0	0	5	0
20140611	1	1	4	2	2	2	1	0	1	0	5	2
20140731	1	1	1	2	2	2	1	0	0	0	5	0
20140814	1	1	4	2	2	2	1	0	0	0	5	2
20140825	1	1	3	2	2	2	0	1	0	0	5	2
20141027	1	1	4	2	2	2	1	1	0	0	5	0
20140123	1	1	2	2	2	2	0	0	1	0	5	2
20140729	2	1	4	2	2	2	1	0	0	0	5	2
20140826	1	1	3	2	2	2	1	0	1	0	5	2
20140812	1	1	2	2	2	2	1	1	1	0	5	2
20141028	1	1	4	2	1	2	1	0	0	0	5	2
20140123	1	1	1	2	2	2	0	0	0	0	5	0
20140815	1	1	2	2	2	2	1	0	1	0	5	2
20141029	2	1	1	2	1	2	1	1	0	0	5	0
20140814	2	1	4	2	2	2	1	0	1	0	5	0
20141029	1	1	1	2	2	2	0	0	0	0	5	2
20140730	1	1	1	2	2	2	0	1	0	0	5	0
20140905	2	1	4	2	2	2	0	1	0	0	5	2
20141121	2	1	1	2	2	2	1	0	0	0	5	2
20140728	1	1	4	2	4	2	1	1	0	0	5	2
20140115	1	1	1	2	3	2	1	0	0	1	5	2
20140903	2	1	2	2	2	2	0	1	0	0	5	2
20140605	1	1	2	2	2	2	0	1	0	0	5	0
20141121	2	1	3	2	2	2	0	1	1	0	5	2
20140822	2	1	3	2	2	2	1	1	1	0	5	2
20140313	2	1	4	2	2	2	0	1	0	0	5	0
20140314	1	1	1	2	2	2	0	0	1	0	5	2
20141121	2	1	1	2	3	2	0	1	1	0	5	2
20140822	2	1	4	2	3	2	1	1	0	1	5	2
20140708	1	1	1	2	2	2	1	0	0	1	5	2
20140310	1	1	1	2	2	2	0	0	0	0	5	2
20140731	2	1	1	2	2	2	1	1	1	0	5	2
20140731	1	1	1	2	2	1	1	0	0	1	5	2
20140530	1	1	3	2	3	2	0	1	0	0	5	2
20140530	1	1	1	2	2	2	1	0	1	0	5	2
20140404	2	1	2	2	2	2	1	0	1	0	5	2
20140404	1	1	4	2	4	2	0	0	1	0	5	0
20140530	2	1	3	2	3	2	0	1	0	0	5	2
20141121	2	1	3	2	2	2	1	1	1	0	5	2
20140922	2	1	1	2	2	2	0	1	0	0	5	2
20140123	1	1	3	2	3	2	1	0	1	1	4	2
20140805	1	1	3	2	3	2	0	0	1	0	4	0
20141029	2	1	4	2	2	2	1	1	1	0	4	2
20140731	1	1	1	2	3	2	0	0	1	1	4	2
20140903	2	1	1	2	3	2	0	1	0	0	4	2
20140814	2	1	1	2	2	2	1	0	0	0	4	0
20140825	1	1	1	2	2	2	0	1	1	0	4	0
20141121	1	1	4	2	2	1	0	0	1	1	4	0
20140617	2	1	3	2	2	2	0	1	1	1	4	2
20140825	2	1	1	2	3	2	0	0	0	0	4	2
20140903	2	1	2	2	2	2	1	0	0	0	4	0
20140529	1	1	2	2	3	2	1	0	0	1	4	0
20140416	2	1	2	2	3	2	0	1	0	0	4	0
20141126	2	1	3	2	3	2	0	1	0	0	4	2
20140922	1	1	1	2	2	2	0	0	0	0	4	2
20140714	2	1	1	2	2	2	0	1	1	0	4	0
20141027	2	1	1	2	2	2	0	1	0	1	4	2
20140926	2	1	1	2	2	2	1	1	0	0	4	0
20140822	1	1	1	2	1	2	0	0	0	0	4	0
20140529	1	1	4	2	2	3	1	0	0	0	4	0
20140928	1	1	1	2	2	1	0	0	0	1	4	2
20140924	2	1	1	2	3	2	1	1	1	1	4	2
20140709	2	1	4	2	3	2	1	1	0	1	4	2
20140618	1	1	4	2	3	2	1	1	1	0	4	0
20141029	1	1	1	2	2	1	1	1	0	0	4	2
20140311	1	1	1	2	2	1	0	0	0	1	4	0
20140530	1	1	3	2	2	2	1	1	1	0	4	2
20140731	1	1	4	2	2	2	1	0	0	0	4	2
20140123	2	1	1	2	1	2	0	1	0	1	4	0
20140530	1	1	1	2	1	1	0	1	0	0	4	0
20140626	1	1	1	2	2	2	1	0	0	0	4	2
20140917	2	1	1	2	1	3	0	0	0	0	4	2
20140731	2	1	1	2	1	2	1	1	1	0	4	0
20140529	1	1	3	2	2	2	1	0	1	1	4	0
20140826	1	1	3	2	3	2	0	0	0	0	4	0
20141121	2	1	4	2	3	3	1	1	1	0	4	2
20140718	1	1	2	2	3	2	1	0	0	0	4	2
20140530	1	1	1	2	3	1	0	0	1	0	4	2
20140909	1	1	3	2	4	2	0	1	1	0	4	2
20140903	2	1	1	2	3	2	1	1	0	0	4	0
20140414	1	1	1	2	2	2	0	0	0	1	4	2
20141030	2	1	1	2	3	2	0	0	1	0	4	0
20140123	2	1	3	2	2	2	0	1	0	0	4	2
20141027	2	1	3	2	3	2	1	1	0	0	4	0
20140123	1	1	4	2	4	2	0	0	0	0	4	2
20140417	2	1	3	2	3	2	0	1	1	0	4	2
20141028	1	1	4	2	3	2	0	0	0	0	4	0
20140825	1	1	4	2	4	2	0	1	0	0	4	0
20140404	1	1	2	2	3	2	0	0	1	0	4	0
20141029	2	1	1	2	2	2	0	1	1	1	4	2
20140310	1	1	2	2	3	2	1	1	0	0	4	2
20140311	1	1	4	2	4	2	0	1	0	1	4	0
20140910	1	1	3	2	3	2	0	1	0	0	4	2
20140117	1	1	4	2	3	2	1	1	0	0	4	0
20140417	1	1	1	2	3	2	1	0	1	0	4	0
20140310	2	1	4	2	2	2	0	1	1	0	4	0
20141024	1	1	4	2	3	1	0	0	1	0	4	2
20140730	1	1	1	2	2	2	0	1	0	0	4	0
20141029	2	1	1	2	2	2	1	1	1	1	4	2
20140310	2	1	1	2	2	2	0	1	0	1	4	0
20140310	1	1	2	2	3	2	1	1	0	1	4	2
20141029	2	1	1	2	2	2	0	1	0	0	4	0
20141008	2	1	4	2	3	2	0	0	1	0	4	2
20140616	2	1	3	2	3	2	1	1	0	0	4	2
20140414	2	1	2	2	3	3	1	0	0	0	4	2
20140311	1	1	4	2	3	2	1	0	1	1	4	2
20140529	1	1	3	2	3	1	0	0	1	0	4	0
20141215	2	1	4	2	2	2	1	0	1	0	4	2
20140626	2	1	1	2	2	3	0	0	1	0	4	2
20140731	1	1	3	2	3	2	0	1	0	0	4	0
20140815	2	1	1	2	3	2	1	1	0	0	4	2
20140331	2	1	1	2	2	2	0	0	1	0	4	2
20140611	2	1	4	2	3	3	0	0	1	0	4	0
20141028	1	1	1	2	2	2	0	0	0	1	4	0
20141028	2	1	1	2	1	2	0	0	0	0	4	0
20140311	1	1	2	2	2	1	0	0	0	0	4	0
20141029	1	1	2	2	1	3	0	0	0	0	4	0
20141029	2	1	1	2	3	3	1	0	1	0	4	2
20140312	2	1	1	2	1	2	1	1	0	0	4	2
20140730	2	1	1	2	3	2	1	0	0	0	4	2
20140313	2	1	1	2	2	2	1	1	0	0	4	2
20140825	2	1	4	2	3	3	1	1	0	1	4	0
20140812	2	1	1	2	2	2	0	0	1	0	4	0
20141029	1	1	1	2	4	2	0	1	0	1	4	2
20140123	2	1	1	2	3	2	0	1	0	0	4	0
20140825	2	1	1	2	3	2	0	1	0	0	3	2
20140403	1	1	1	2	1	1	1	0	0	0	3	2
20140731	1	1	1	2	3	2	1	1	1	1	3	2
20140311	2	1	3	2	3	2	0	1	0	0	3	0
20140530	1	1	1	2	2	2	0	0	0	0	3	2
20140825	1	1	1	2	2	3	0	0	1	1	3	0
20140530	1	1	3	2	4	1	1	0	0	0	3	0
20140814	2	1	2	2	4	2	0	0	0	0	3	2
20140825	2	1	3	2	2	2	0	1	1	0	3	0
20140403	2	1	1	2	2	2	0	0	0	0	3	2
20140116	1	1	1	2	3	2	0	0	0	1	3	0
20140410	2	1	1	2	2	2	0	1	0	0	3	0
20140311	2	1	4	2	3	2	0	0	0	0	3	0
20140915	1	1	1	2	3	2	0	0	0	0	2	2
20140310	1	1	1	2	2	1	1	1	1	0	2	0
20140219	2	1	1	2	4	1	0	1	0	0	2	0
20140627	1	1	4	2	2	1	1	0	1	0	2	0
20140903	1	1	1	2	4	1	1	0	0	0	2	0
20140123	2	1	1	2	2	2	0	1	1	0	2	2
20140610	2	1	2	2	3	1	0	0	1	0	1	0
20140826	2	1	3	2	4	2	0	1	0	0	1	0
20140826	1	1	2	2	3	1	1	0	0	0	1	0
20140313	1	1	3	2	2	2	1	1	0	0	6	0
20140725	1	1	1	2	2	3	1	1	1	0	6	0
20140402	1	1	3	2	1	2	1	0	1	1	6	0
20140403	1	1	3	2	3	2	0	0	0	1	6	0
20140618	2	1	3	2	2	3	1	1	1	1	6	2
20140912	1	1	3	2	2	3	1	0	0	0	6	2
20140314	1	1	1	2	2	2	0	0	0	1	6	0
20140909	1	1	4	2	1	2	1	1	0	1	6	0
20140912	2	1	1	2	1	2	1	1	0	0	6	2
20140714	1	1	2	2	3	2	1	1	0	1	6	0
20140523	1	1	3	2	2	2	0	1	0	1	6	0
20140314	1	1	2	2	2	2	1	0	0	0	6	2
20140813	2	1	4	2	2	2	0	1	0	0	6	2
20140312	1	1	1	2	4	2	0	1	1	0	6	0
20140404	1	1	4	2	2	2	0	0	1	1	6	2
20140313	1	1	1	2	2	2	1	0	1	0	6	0
20140312	2	1	3	2	1	2	0	0	0	1	6	0
20140117	2	1	2	2	1	2	1	1	1	1	6	2
20140428	1	1	3	2	2	2	0	0	1	0	6	0
20140220	1	1	3	2	3	2	1	0	0	0	6	0
20140811	1	1	4	2	4	2	0	0	1	0	6	0
20140403	1	1	4	2	3	3	1	1	0	0	6	0
20140404	2	1	4	2	2	2	0	1	0	0	6	2
20140114	1	1	3	2	2	2	0	0	0	0	6	2
20140911	1	1	3	2	2	2	1	0	1	0	6	0
20140313	2	1	4	2	3	3	1	1	0	0	6	2
20140905	1	1	1	2	2	2	1	0	0	0	6	0
20141208	1	1	4	2	4	2	0	1	0	0	6	0
20140314	2	1	2	2	1	2	0	0	1	0	6	2
20140411	1	1	4	2	4	2	1	0	1	1	6	0
20140905	2	1	1	2	1	2	0	1	1	0	6	0
20140220	1	1	4	2	3	2	0	1	0	0	6	2
20140314	1	1	1	2	2	2	1	1	0	1	6	2
20140813	1	1	4	2	2	2	1	1	1	0	6	0
20140912	2	1	3	2	3	2	0	1	0	0	6	2
20140722	1	1	1	2	3	2	0	0	1	0	6	0
20140626	1	1	1	2	2	2	1	1	1	0	6	0
20140314	2	1	1	2	1	2	1	0	0	0	6	2
20140714	1	1	4	2	2	2	1	0	0	1	6	0
20140616	2	1	1	2	1	2	0	0	1	0	6	2
20140910	2	1	3	2	2	2	0	0	0	0	6	0
20140404	1	1	4	2	3	2	1	0	1	1	6	2
20140312	2	1	1	2	1	2	1	1	1	0	6	2
20141121	1	1	1	2	1	2	0	0	0	0	6	0
20140812	2	1	3	2	3	2	0	1	1	0	6	2
20140220	1	1	2	2	2	2	1	0	1	1	6	2
20140617	1	1	1	2	2	2	1	0	1	1	6	2
20140729	1	1	1	2	2	2	1	0	1	0	6	0
20140815	1	1	1	2	1	3	0	1	1	1	6	0
20140812	2	1	3	2	2	3	0	0	0	0	6	0
20140617	2	1	1	2	2	2	0	1	0	0	6	0
20140314	1	1	4	2	4	2	1	0	1	1	6	0
20140910	1	1	4	2	4	2	1	0	0	0	6	2
20140812	2	1	3	2	1	2	0	0	0	0	6	0
20140911	1	1	4	2	2	3	0	0	0	0	6	2
20140722	1	1	4	2	3	2	0	0	0	0	6	0
20140410	1	1	3	2	2	2	1	0	1	0	5	2
20140312	1	1	4	2	3	2	0	0	0	0	5	0
20140114	2	1	3	2	3	2	1	1	1	0	5	2
20141121	2	1	1	2	1	2	1	0	1	0	5	0
20140410	2	1	1	2	1	3	1	0	0	1	5	2
20140313	1	1	1	2	2	2	0	1	1	0	5	0
20140117	1	1	3	2	4	2	1	0	0	0	5	0
20141114	1	1	3	2	2	2	1	0	0	0	5	2
20140715	1	1	4	2	4	2	1	0	0	1	5	0
20140312	1	1	4	2	2	2	1	1	0	0	5	0
20140716	1	1	1	2	2	2	1	1	0	1	5	2
20140811	2	1	4	2	2	2	1	1	0	1	5	2
20140402	1	1	3	2	1	2	1	1	0	0	5	0
20140616	1	1	1	2	2	2	1	1	1	0	5	2
20140403	2	1	3	2	2	2	0	1	1	1	5	2
20140616	1	1	1	2	2	2	0	0	0	1	5	2
20140312	2	1	3	2	3	2	1	1	0	0	5	2
20140905	1	1	3	2	3	2	1	0	1	0	5	2
20140619	1	1	1	2	2	2	1	0	0	0	5	2
20140312	1	1	4	2	3	2	0	0	1	0	5	2
20140617	1	1	3	2	2	2	0	1	0	0	5	2
20140402	1	1	3	2	4	2	1	0	1	0	5	2
20140715	1	1	3	2	3	2	0	0	1	0	5	0
20140805	1	1	3	2	2	2	1	0	1	0	5	2
20140416	2	1	4	2	2	2	1	0	1	1	5	0
20140116	1	1	3	2	4	2	1	0	0	0	5	2
20140909	1	1	3	2	3	2	0	0	0	0	5	2
20140819	1	1	1	2	2	2	1	0	0	0	5	2
20140814	2	1	2	2	2	2	0	1	0	0	5	2
20140812	1	1	4	2	2	2	0	0	0	0	5	2
20140722	1	1	1	2	2	2	1	0	1	1	5	0
20140314	2	1	3	2	3	2	1	1	0	1	5	2
20140911	1	1	4	2	2	2	1	1	1	0	5	2
20140905	1	1	1	2	2	2	1	0	0	1	5	2
20140911	2	1	1	2	2	3	1	0	1	0	5	2
20140219	2	1	3	2	4	2	0	0	0	0	5	0
20140221	1	1	3	2	3	2	1	1	0	0	5	2
20140911	1	1	1	2	2	1	0	0	1	0	5	0
20140528	2	1	3	2	3	2	0	1	0	0	5	0
20140716	2	1	2	2	2	1	0	1	1	0	5	2
20140813	1	1	1	2	3	2	0	1	0	0	5	2
20140911	2	1	3	2	3	2	1	1	0	0	5	2
20140220	1	1	3	2	2	2	1	0	0	0	5	2
20140220	2	1	3	2	1	2	0	1	0	0	5	2
20140909	1	1	4	2	2	1	1	0	0	0	5	0
20140404	2	1	2	2	2	2	1	1	1	1	5	2
20141118	2	1	3	2	2	2	0	1	0	0	5	2
20140616	2	1	1	2	2	2	0	1	0	0	5	0
20140221	1	1	4	2	4	2	1	1	0	1	5	2
20140715	2	1	4	2	2	2	0	0	1	0	5	2
20140825	2	1	1	2	2	2	1	1	1	0	5	2
20140811	2	1	3	2	2	2	0	1	1	0	5	0
20140617	2	1	4	2	2	3	0	0	1	0	5	0
20141210	2	1	4	2	2	2	0	0	0	1	5	0
20140620	1	1	1	2	2	2	1	0	1	1	5	2
20140812	2	1	1	2	2	3	1	1	0	1	5	0
20140729	1	1	3	2	3	2	1	0	1	1	5	2
20141208	1	1	3	2	4	2	1	0	0	0	5	2
20140312	1	1	3	2	2	2	0	1	0	0	5	0
20140324	1	1	4	2	2	2	1	0	0	0	5	2
20140709	2	1	3	2	2	2	1	0	0	0	5	2
20140402	1	1	4	2	3	2	1	1	0	0	5	2
20140711	1	1	3	2	2	2	0	0	0	0	5	2
20140815	2	1	1	2	2	2	0	0	0	0	5	2
20140404	1	1	2	2	2	2	1	1	0	1	5	2
20140619	1	1	1	2	1	2	0	1	1	0	5	0
20140811	2	1	2	2	3	2	1	1	1	1	5	2
20140813	2	1	1	2	2	2	0	1	1	0	5	2
20140616	1	1	2	2	2	3	0	1	1	0	5	2
20140616	2	1	1	2	2	2	1	0	0	0	5	2
20141208	1	1	2	2	2	2	0	1	0	0	5	2
20140404	1	1	4	2	4	2	1	1	0	0	5	0
20140617	1	1	1	2	2	2	1	0	0	1	5	0
20141208	1	1	3	2	1	2	0	0	1	0	5	0
20140813	1	1	1	2	2	2	0	1	0	0	5	0
20140401	2	1	4	2	2	2	0	1	0	0	5	2
20140404	1	1	3	2	2	2	1	0	1	0	5	0
20140715	1	1	3	2	2	2	0	0	0	0	5	0
20140311	1	1	3	2	3	3	0	0	0	0	5	0
20140418	2	1	3	2	3	2	0	0	1	0	5	2
20140811	1	1	1	2	2	2	0	1	1	1	5	0
20140813	2	1	1	2	2	2	1	0	1	1	5	2
20140220	2	1	1	2	2	2	0	1	0	0	5	2
20140619	1	1	3	2	2	2	0	1	0	0	5	2
20140814	2	1	4	2	3	2	1	1	0	0	5	2
20140616	1	1	1	2	1	1	1	1	0	0	5	0
20140408	1	1	2	2	2	2	0	0	1	0	5	2
20140617	2	1	1	2	2	2	0	1	1	0	5	2
20140616	2	1	1	2	2	2	0	1	1	0	5	0
20140905	2	1	1	2	2	3	0	1	0	0	5	2
20140410	2	1	1	2	1	2	1	1	0	0	5	2
20140909	2	1	1	2	2	2	0	0	0	0	5	2
20140126	1	1	3	2	3	2	0	0	1	0	5	0
20140910	2	1	4	2	2	2	0	1	0	0	5	2
20140619	1	1	4	2	2	2	1	1	0	0	5	0
20140618	2	1	4	2	2	2	0	1	1	0	5	2
20140814	1	1	1	2	3	2	1	0	1	0	5	0
20141027	2	1	4	2	3	2	0	1	1	0	5	0
20140401	2	1	4	2	2	2	0	1	0	0	5	2
20140220	1	1	1	2	2	2	0	1	0	0	5	0
20140722	1	1	1	2	2	2	0	0	1	0	5	0
20140715	2	1	4	2	3	2	0	1	0	0	5	2
20140314	2	1	1	2	2	2	0	0	1	0	5	2
20140404	1	1	2	2	3	2	1	1	1	0	5	2
20140716	2	1	1	2	2	2	1	1	0	1	5	2
20140627	1	1	4	2	2	2	1	0	0	0	5	0
20140912	1	1	4	2	2	2	0	0	1	0	5	0
20140114	2	1	4	2	1	2	0	1	1	0	5	2
20140912	1	1	1	2	3	2	1	0	1	0	5	0
20140617	1	1	3	2	2	2	0	1	1	0	5	2
20140314	1	1	3	2	2	2	0	0	0	0	5	2
20140617	2	1	1	2	2	2	0	0	0	0	5	2
20140912	2	1	1	2	2	2	0	0	1	0	5	0
20140402	2	1	4	2	2	2	1	0	0	0	5	2
20140813	1	1	2	2	3	2	0	0	0	0	5	2
20140915	2	1	3	2	2	3	1	0	0	0	5	2
20140618	2	1	4	2	3	2	0	1	0	0	4	0
20141103	2	1	3	2	2	2	0	1	1	0	4	2
20140812	2	1	4	2	3	2	0	1	1	0	4	0
20140716	1	1	1	2	2	2	0	1	0	1	4	0
20140813	2	1	1	2	2	2	0	0	1	0	4	2
20140404	1	1	3	2	2	2	0	1	0	0	4	0
20140314	1	1	1	2	2	1	1	1	0	1	4	2
20140117	1	1	1	2	3	2	1	0	0	0	4	2
20140704	2	1	4	2	2	2	1	0	0	0	4	2
20140924	2	1	2	2	2	2	0	0	0	0	4	2
20140312	2	1	4	2	3	2	0	1	1	0	4	2
20140402	2	1	4	2	2	2	0	0	0	1	4	2
20140221	2	1	2	2	2	2	0	1	0	0	4	0
20141212	2	1	4	2	2	2	0	1	0	1	4	2
20140725	1	1	2	2	2	2	1	0	1	0	4	0
20140617	2	1	3	2	3	2	0	1	0	0	4	2
20140116	1	1	1	2	1	2	1	1	0	0	4	0
20140814	1	1	4	2	3	2	0	1	0	0	4	0
20141208	1	1	1	2	2	1	0	0	1	0	4	0
20140909	1	1	4	2	2	1	0	1	0	0	4	2
20140905	1	1	3	2	2	2	0	1	0	0	4	2
20140909	2	1	1	2	2	2	0	1	1	0	4	2
20140314	1	1	3	2	3	2	1	0	1	1	4	2
20140404	1	1	4	2	2	2	0	1	1	1	4	2
20140729	1	1	2	2	3	2	0	0	0	1	4	2
20140210	1	1	1	2	3	2	0	0	0	1	4	2
20140619	2	1	1	2	3	2	1	1	1	0	4	2
20140617	2	1	3	2	2	2	0	1	1	0	4	2
20140404	1	1	1	2	2	2	0	1	0	1	4	0
20140221	1	1	2	2	3	2	1	0	1	1	4	2
20141118	2	1	4	2	2	2	0	1	0	0	4	0
20140403	1	1	1	2	2	2	0	0	1	0	4	0
20140714	2	1	1	2	2	2	0	1	1	0	4	2
20140616	1	1	4	2	3	2	0	1	0	0	4	2
20140220	1	1	3	2	2	2	1	1	1	1	4	0
20140210	1	1	2	2	2	2	1	1	0	1	4	2
20141118	1	1	4	2	3	2	0	1	1	0	4	2
20140114	2	1	4	2	2	2	0	1	0	1	4	0
20140627	2	1	4	2	2	2	0	0	0	0	4	2
20140617	2	1	4	2	2	2	1	0	0	1	4	2
20140117	2	1	4	2	2	2	0	1	0	0	4	2
20140618	2	1	4	2	2	2	0	1	0	1	4	2
20140617	1	1	1	2	2	1	0	1	0	1	4	0
20140729	1	1	3	2	3	3	1	1	0	0	4	0
20140721	1	1	1	2	3	2	1	0	0	1	4	2
20141029	1	1	2	2	3	2	0	1	0	0	4	2
20140814	2	1	1	2	2	2	0	0	0	0	4	2
20141029	2	1	3	2	3	2	1	0	1	0	4	2
20140715	2	1	2	2	2	2	1	0	0	1	4	2
20140523	2	1	4	2	2	2	1	1	1	0	4	0
20140530	2	1	2	2	2	2	1	0	1	1	4	0
20140314	1	1	4	2	3	2	0	0	0	0	4	0
20140403	2	1	4	2	3	2	0	1	0	0	4	2
20140410	1	1	4	2	3	2	1	0	0	1	4	0
20140402	2	1	1	2	2	2	0	1	1	0	4	2
20140620	1	1	4	2	2	2	1	0	0	0	4	2
20140814	1	1	4	2	3	2	1	0	0	0	4	0
20140715	1	1	4	2	2	2	1	1	0	1	4	2
20140313	2	1	1	2	2	2	1	1	0	1	4	2
20140812	1	1	4	2	3	2	0	0	1	0	4	0
20140715	1	1	2	2	3	2	0	0	1	0	4	2
20140404	2	1	1	2	2	2	1	1	1	1	4	2
20140616	2	1	1	2	2	2	0	1	1	0	4	2
20140620	2	1	3	2	3	2	0	1	0	0	4	0
20140812	2	1	1	2	2	2	0	1	1	0	4	0
20140117	1	1	4	2	2	2	0	0	0	0	4	0
20140313	1	1	1	2	2	2	0	0	0	0	4	2
20140814	1	1	2	2	2	1	0	1	0	1	4	2
20140905	1	1	2	2	3	2	1	1	1	0	4	0
20141208	2	1	4	2	2	2	1	1	0	0	4	2
20140408	2	1	2	2	2	2	1	0	0	1	4	2
20141121	2	1	1	2	2	2	0	1	0	1	4	2
20140709	2	1	4	2	3	2	1	0	0	0	4	0
20140114	1	1	4	2	3	2	1	0	1	0	4	2
20140811	1	1	1	2	2	2	0	0	1	0	4	0
20141215	2	1	4	2	2	2	0	1	0	0	4	0
20140627	1	1	1	2	2	2	1	0	0	0	4	2
20140826	1	1	1	2	3	2	1	0	1	0	4	0
20140402	2	1	4	2	3	2	0	1	0	1	4	2
20140619	1	1	4	2	3	2	1	0	1	1	4	0
20140404	1	1	3	2	2	1	1	0	1	0	4	2
20140709	2	1	4	2	3	2	0	1	0	0	4	2
20140618	1	1	4	2	4	2	1	0	0	0	4	2
20140312	1	1	3	2	3	2	0	0	0	0	4	0
20140716	1	1	1	2	2	2	0	1	1	1	4	2
20140714	2	1	1	2	3	2	1	1	1	0	4	0
20140312	1	1	1	2	3	2	1	0	0	0	3	2
20141118	2	1	1	2	2	2	1	0	1	0	3	2
20140909	2	1	3	2	3	2	0	1	0	0	3	2
20140620	2	1	4	2	2	2	1	1	0	0	3	2
20140926	2	1	1	2	2	2	0	1	1	0	3	0
20140911	2	1	1	2	1	3	0	1	1	0	3	0
20140901	2	1	4	2	3	2	0	0	0	0	3	0
20140401	1	1	3	2	4	1	1	0	1	0	3	0
20140616	1	1	1	2	2	2	1	0	0	1	3	2
20140314	1	1	3	2	4	2	0	0	0	0	3	2
20140626	1	1	4	2	3	2	0	1	0	0	3	2
20140403	1	1	1	2	2	2	1	0	1	0	3	2
20140117	1	1	4	2	3	1	1	0	1	0	3	2
20140627	1	1	4	2	2	1	1	0	1	0	2	2
20140812	1	1	1	2	2	1	1	0	0	0	2	2
20140616	2	1	4	2	4	1	1	0	0	0	2	2
20140616	2	1	1	2	2	1	1	1	1	0	2	2
20140314	2	1	2	2	4	2	0	1	0	1	2	0
20140716	2	1	2	2	2	1	0	1	0	0	2	2
20140813	2	1	1	2	2	1	1	0	0	0	1	2
20140812	2	1	1	2	2	1	1	0	0	1	1	2
20140310	2	1	1	2	3	1	1	1	1	0	1	2
20140909	1	1	4	2	4	1	0	0	1	0	1	0
20141209	1	1	3	2	1	2	0	0	1	0	6	0
20140625	1	1	1	2	4	2	0	0	0	0	6	2
20140925	1	1	2	2	3	2	1	0	0	1	5	2
20140926	1	1	2	2	3	2	0	0	0	0	5	0
20140812	2	1	3	2	4	2	1	0	1	0	5	2
20140625	2	1	1	2	2	2	0	1	0	1	5	2
20140925	1	1	3	2	2	2	0	0	0	0	5	2
20140926	1	1	2	2	2	2	0	0	0	1	5	0
20140418	1	1	2	2	3	2	1	0	1	0	5	0
20140626	1	1	4	2	2	2	1	0	0	0	5	2
20140312	2	1	1	2	2	2	0	1	1	1	5	2
20140923	2	1	4	2	2	2	0	0	0	0	5	2
20140625	1	1	1	2	2	2	0	0	0	1	5	0
20140925	1	1	4	2	2	3	0	0	0	0	5	0
20140625	1	1	1	2	2	2	1	0	0	0	5	0
20140625	2	1	1	2	2	2	0	0	1	0	5	2
20140418	2	1	1	2	3	3	0	0	1	0	5	0
20140926	1	1	2	2	1	2	1	0	0	1	4	2
20140404	2	1	4	2	2	2	1	1	1	1	4	0
20140926	2	1	1	2	3	2	0	1	0	0	4	2
20140417	1	1	3	2	3	2	1	0	0	0	4	0
20140401	2	1	2	2	2	2	1	1	0	0	4	2
20140925	1	1	3	2	3	2	0	0	1	0	4	2
20140925	1	1	3	2	2	2	0	0	1	0	4	0
20141027	1	1	4	2	2	2	1	1	1	0	4	2
20140625	1	1	4	2	3	2	0	0	0	1	4	2
20140923	2	1	4	2	1	1	1	0	0	0	4	2
20140925	2	1	1	2	2	2	1	0	1	0	4	2
20140625	1	1	4	2	1	2	1	0	0	0	4	0
20140925	1	1	1	2	2	2	0	0	0	0	4	2
20140925	1	1	3	2	3	2	0	0	0	0	4	0
20140626	1	1	4	2	2	2	0	0	0	0	4	2
20140923	1	1	1	2	2	2	0	0	0	0	4	0
20140416	2	1	4	2	2	3	0	0	0	0	3	0
20140603	1	1	2	2	3	2	0	0	1	0	3	2
20140828	1	1	2	2	3	2	0	0	0	0	6	0
20140603	1	1	4	2	4	2	1	0	1	0	6	2
20141127	1	1	3	2	2	2	1	0	0	0	5	0
20140915	1	1	2	2	2	2	1	1	1	0	5	2
20140902	2	1	2	2	2	3	0	0	1	0	4	2
20140903	2	1	3	2	3	3	0	0	0	1	4	0
20140616	1	1	1	2	4	2	1	0	1	0	4	2
[truncated: 40,716 more rows]
